# Supplementary material for: New Fusarin Derivatives from the Marine Algicolous Fungus Penicillium steckii SCSIO41040
Source: MDPI journal article supplement (doi:10.3390/md21100532), 2023-10-12
Supplement: s1 [file s1]

## Supporting Information

### New Fusarin Derivatives from the Marine Algicolous Fungus *Penicillium steckii* SCSIO41040

Yingying Song <sup>1,2</sup>, Jianglian She <sup>1,2</sup>, Weihao Chen <sup>1</sup>, Jiamin Wang <sup>1,2</sup>,  
Yanhui Tan <sup>3</sup>, Xiaoyan Pang <sup>1</sup>, Xuefeng Zhou <sup>1,2</sup>, Junfeng Wang <sup>1,2,\*</sup>  
and Yonghong Liu <sup>1,2,\*</sup>

1 CAS Key Laboratory of Tropical Marine Bio-Resources and Ecology, Guangdong Key Laboratory of Marine Materia Medica, South China Sea Institute of Oceanology, Chinese Academy of Sciences, Guangzhou 510301, China; songyingying19@mails.ucas.ac.cn (Y.S.); shejianglian20@mails.ucas.ac.cn (J.S.); chenweihao17@mails.ucas.ac.cn (W.C.); wangjiamin20@mails.ucas.ac.cn (J.W.); xypang@scsio.ac.cn (X.P.); xfzhou@scsio.ac.cn (X.Z.)

2 University of Chinese Academy of Sciences, Beijing 100049, China

3 State Key Laboratory for Chemistry and Molecular Engineering of Medicinal Resources, School of Chemistry and Pharmaceutical Sciences, Guangxi Normal University, Guilin 541004, China; tyh533@126.com

\* Correspondence: wangjunfeng@scsio.ac.cn (J.W.);  
yonghongliu@scsio.ac.cn (Y.L.)

## List of Supporting Information

**The ITS gene sequence data of *Penicillium* sp. SCSIO 41040**

**Figure S1**  $^1\text{H}$  NMR spectrum of compound **1** in  $\text{DMSO-}d_6$

**Figure S2**  $^{13}\text{C}$  NMR spectrum of compound **1** in  $\text{DMSO-}d_6$

**Figure S3** DEPT135 spectrum of compound **1** in  $\text{DMSO-}d_6$

**Figure S4**  $^1\text{H-}^1\text{H}$  COSY spectrum of compound **1** in  $\text{DMSO-}d_6$

**Figure S5** HSQC spectrum of compound **1** in  $\text{DMSO-}d_6$

**Figure S6** HMBC spectrum of compound **1** in  $\text{DMSO-}d_6$

**Figure S7** NOESY spectrum of compound **1** in  $\text{DMSO-}d_6$

**Figure S8** HRESIMS spectrum of compound **1**

**Figure S9** UV spectrum of **1**

**Figure S10** CD spectrum of **1**

**Figure S11**  $^1\text{H}$  NMR spectrum of compound **2** in  $\text{DMSO-}d_6$

**Figure S12**  $^{13}\text{C}$  NMR spectrum of compound **2** in  $\text{DMSO-}d_6$

**Figure S13** DEPT135 spectrum of compound **2** in  $\text{DMSO-}d_6$

**Figure S14**  $^1\text{H-}^1\text{H}$  COSY spectrum of compound **2** in  $\text{DMSO-}d_6$

**Figure S15** HSQC spectrum of compound **2** in  $\text{DMSO-}d_6$

**Figure S16** HMBC spectrum of compound **2** in  $\text{DMSO-}d_6$

**Figure S17** NOESY spectrum of compound **2** in  $\text{DMSO-}d_6$

**Figure S18** HRESIMS spectrum of compound **2**

**Figure S19** UV spectrum of **2**

**Figure S20** CD spectrum of **2**

**Figure S21**  $^1\text{H}$  NMR spectrum of compound **3** in  $\text{DMSO-}d_6$

**Figure S22**  $^{13}\text{C}$  NMR spectrum of compound **3** in  $\text{DMSO-}d_6$

**Figure S23** DEPT135 spectrum of compound **3** in  $\text{DMSO-}d_6$

**Figure S24**  $^1\text{H-}^1\text{H}$  COSY spectrum of compound **3** in  $\text{DMSO-}d_6$

**Figure S25** HSQC spectrum of compound **3** in  $\text{DMSO-}d_6$

**Figure S26** HMBC spectrum of compound **3** in  $\text{DMSO-}d_6$

**Figure S27** NOESY spectrum of compound **3** in  $\text{DMSO-}d_6$

**Figure S28** HRESIMS spectrum of compound **3**

**Figure S29** UV spectrum of **3**

**Figure S30**  $^1\text{H}$  NMR spectrum of compound **4** in  $\text{DMSO-}d_6$

**Figure S31**  $^{13}\text{C}$  NMR spectrum of compound **4** in  $\text{DMSO-}d_6$

**Figure S32** DEPT135 spectrum of compound **4** in  $\text{DMSO-}d_6$

**Figure S33**  $^1\text{H-}^1\text{H}$  COSY spectrum of compound **4** in  $\text{DMSO-}d_6$

**Figure S34** HSQC spectrum of compound **4** in  $\text{DMSO-}d_6$

**Figure S35** HMBC spectrum of compound **4** in  $\text{DMSO-}d_6$

**Figure S36** NOESY spectrum of compound **4** in  $\text{DMSO-}d_6$

**Figure S37** HRESIMS spectrum of compound **4**

**Figure S38** UV spectrum of **4**

**Figure S39**  $^1\text{H}$  NMR spectrum of compound **5** in  $\text{DMSO-}d_6$

**Figure S40**  $^{13}\text{C}$  NMR spectrum of compound **5** in  $\text{DMSO-}d_6$

**Figure S41** DEPT135 spectrum of compound **5** in  $\text{DMSO-}d_6$

**Figure S42**  $^1\text{H-}^1\text{H}$  COSY spectrum of compound **5** in  $\text{DMSO-}d_6$

**Figure S43** HSQC spectrum of compound **5** in  $\text{DMSO-}d_6$

**Figure S44** HMBC spectrum of compound **5** in  $\text{DMSO-}d_6$

**Figure S45** NOESY spectrum of compound **5** in  $\text{DMSO-}d_6$

**Figure S46** HRESIMS spectrum of compound **5**

**Figure S47** UV spectrum of **5**

**Table S1** Energies of **1** and **2** at MMFF94 force field

**Table S2** Energies of **1** and **2** at B97-3c level in methanol

**The ITS gene sequence data of *Penicillium* sp. SCSIO 41040**

GATATGCTTAAGTTCAGCGGGTATCCCTACCTGATCCGAGGTCAACCTGAGAAAAAATA  
AAAGGTTGGGGGTTCGGCTGGCGCCGGCCGGGCCTACAAGAGCGGGTGACGAAGCCCC  
ATACGCTCGAGGACCGGACGCGGTGCCGCCGCTGCCTTTCGGGCCCCGTCCCCCCCCGGA  
GCGGGGGGGACGGGGCCCAACACACAAGCCGTGCTTGAGGGCAGCAATGACGCTCG  
GACAGGCATGCCCTCCGGAATACCAGAGGGCGCAATGTGCGTTCAAAGACTCGATGAT  
TCACTGAATTCTGCAATTCACATTAGTTATCGCATTTTCGCTGCGTTCTTCATCGATGCCG  
GAACCAAGAGATCCGTTGTTGAAAGTTTAACTAATTTAGCTAGTTGTCTCAGACTGCA  
ACTTCAGACAGCGTTCAGAGGGGGGCTTCGGCGGGCGCGGGCCCCGGGGGCGGATGCC  
CCCCGGCGGCCTGGCGGCGGGCCCCGCCGAAGCAACACAGGTTCGTGCAACACGGGTG  
GGAGGTTGGACCCAGAGGGCCCTCACTCGGTAATGATCCTTCCGCAG

The NMR spectra were uploaded to the Harvard Dataverse (<https://doi.org/10.7910/DVN/PXCKSJ>).

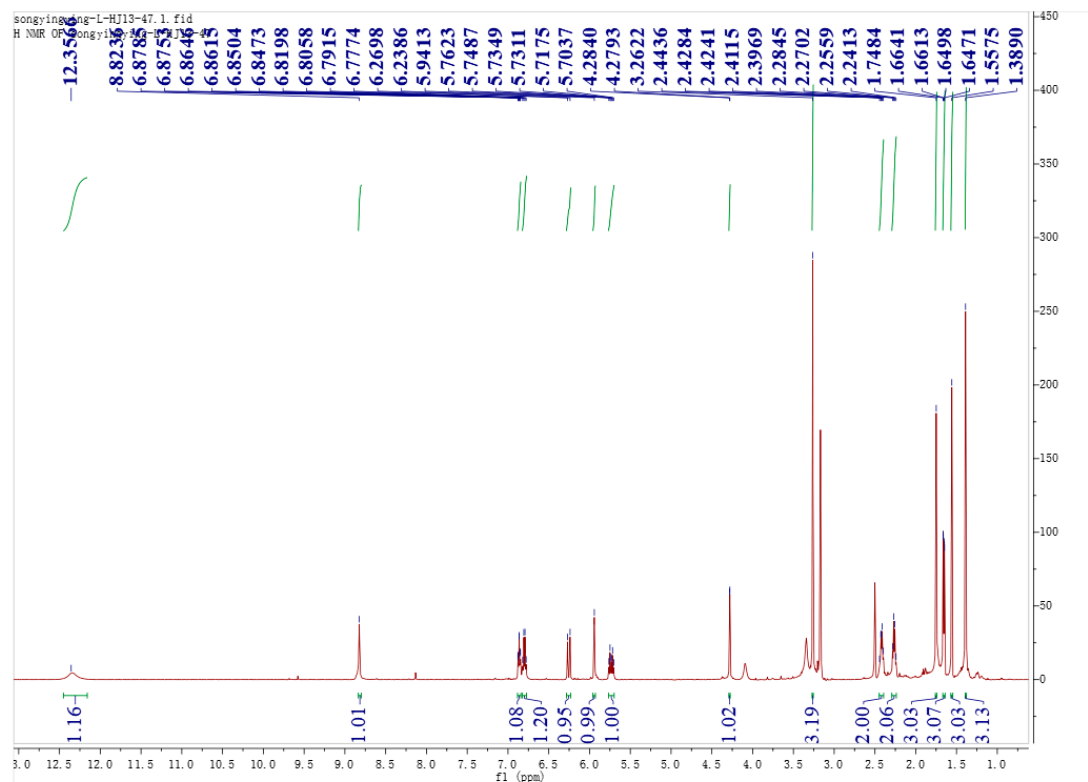

**Figure S1**  $^1\text{H}$  NMR spectrum of compound **1** in  $\text{DMSO}-d_6$

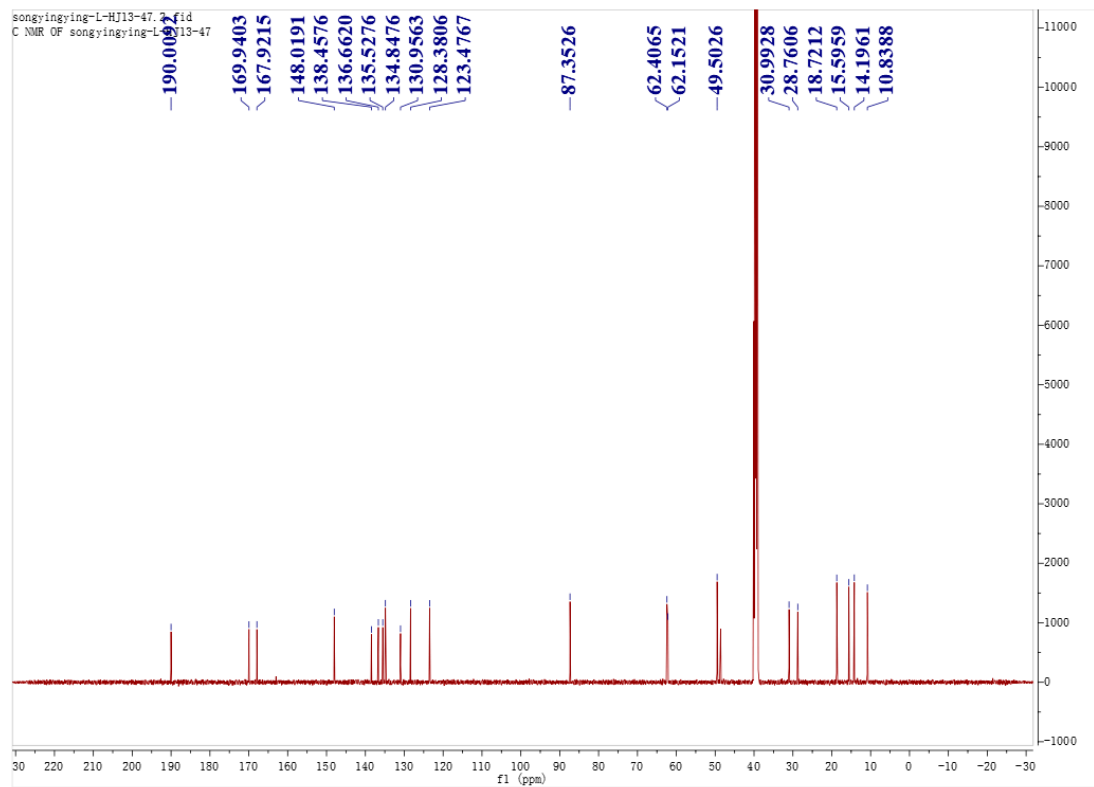

**Figure S2**  $^{13}\text{C}$  NMR spectrum of compound **1** in  $\text{DMSO}-d_6$

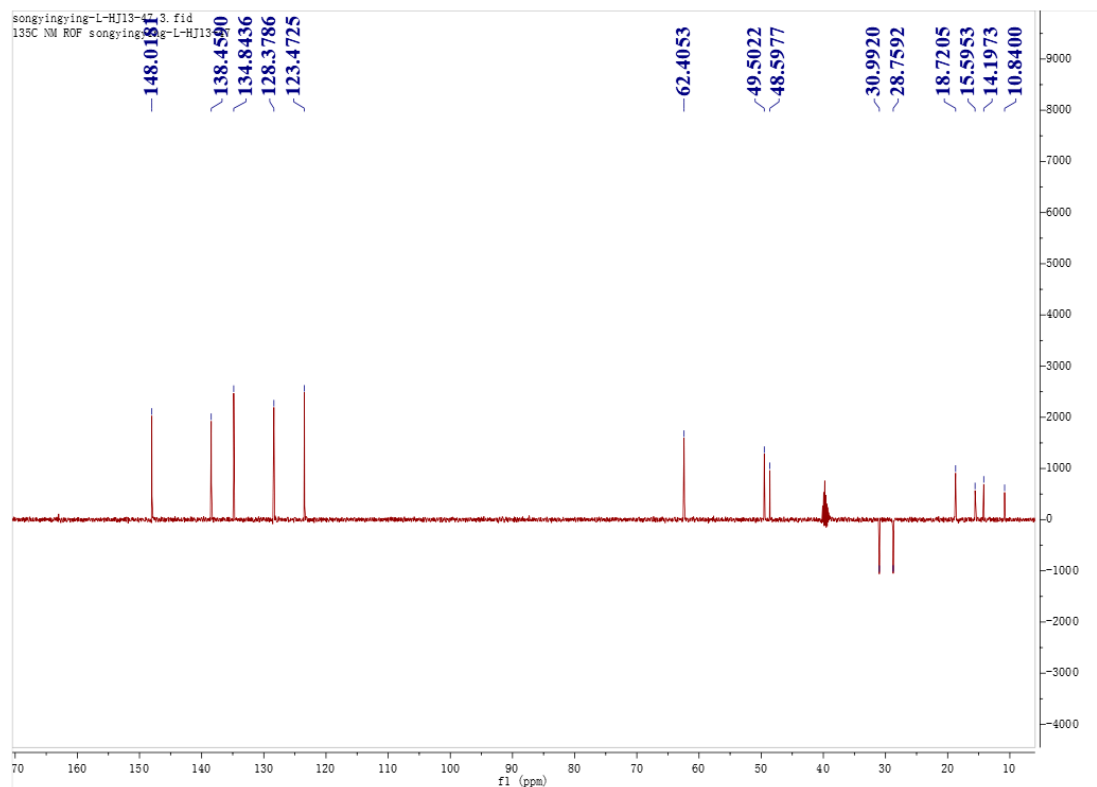

**Figure S3** DEPT135 spectrum of compound **1** in DMSO- $d_6$

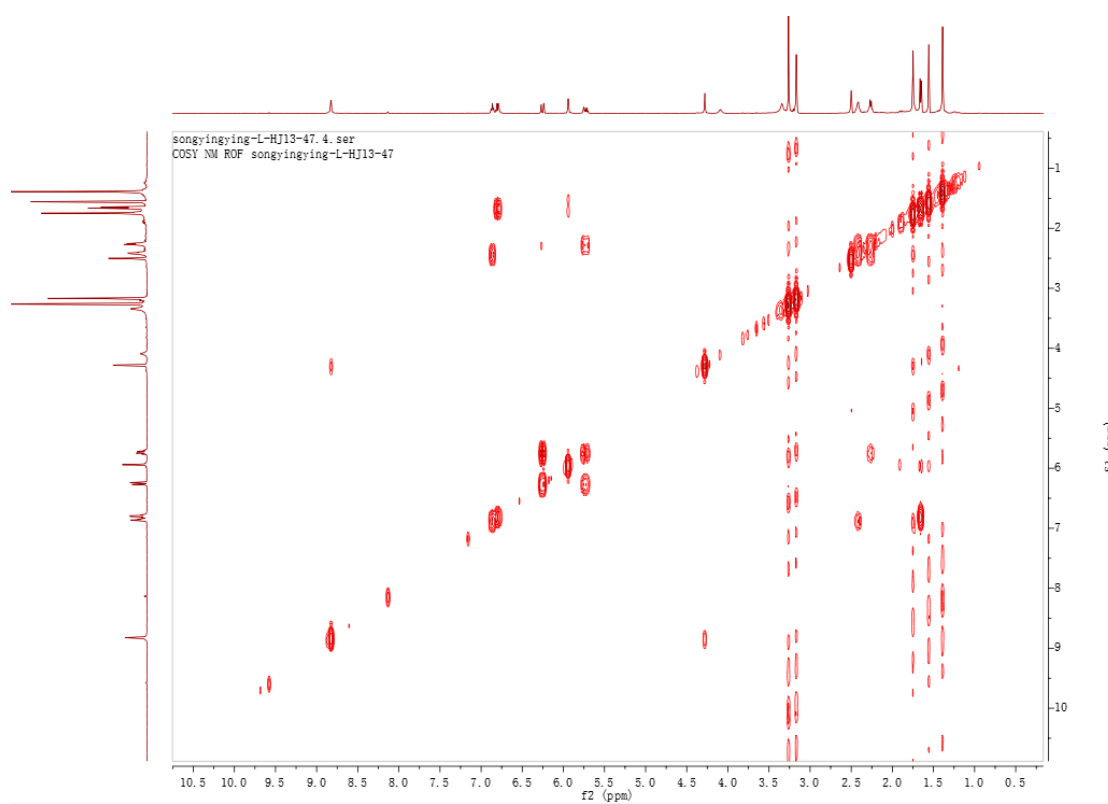

**Figure S4**  $^1\text{H}$ - $^1\text{H}$  COSY spectrum of compound **1** in DMSO- $d_6$

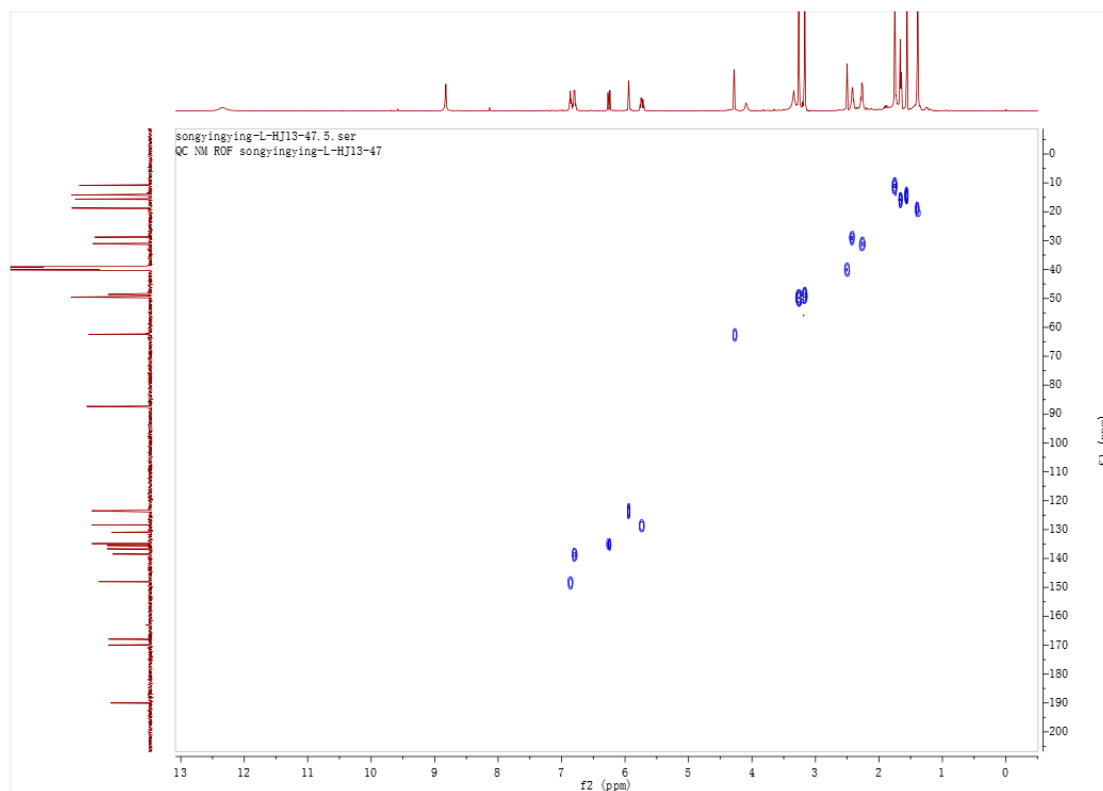

**Figure S5** HSQC spectrum of compound **1** in DMSO- $d_6$

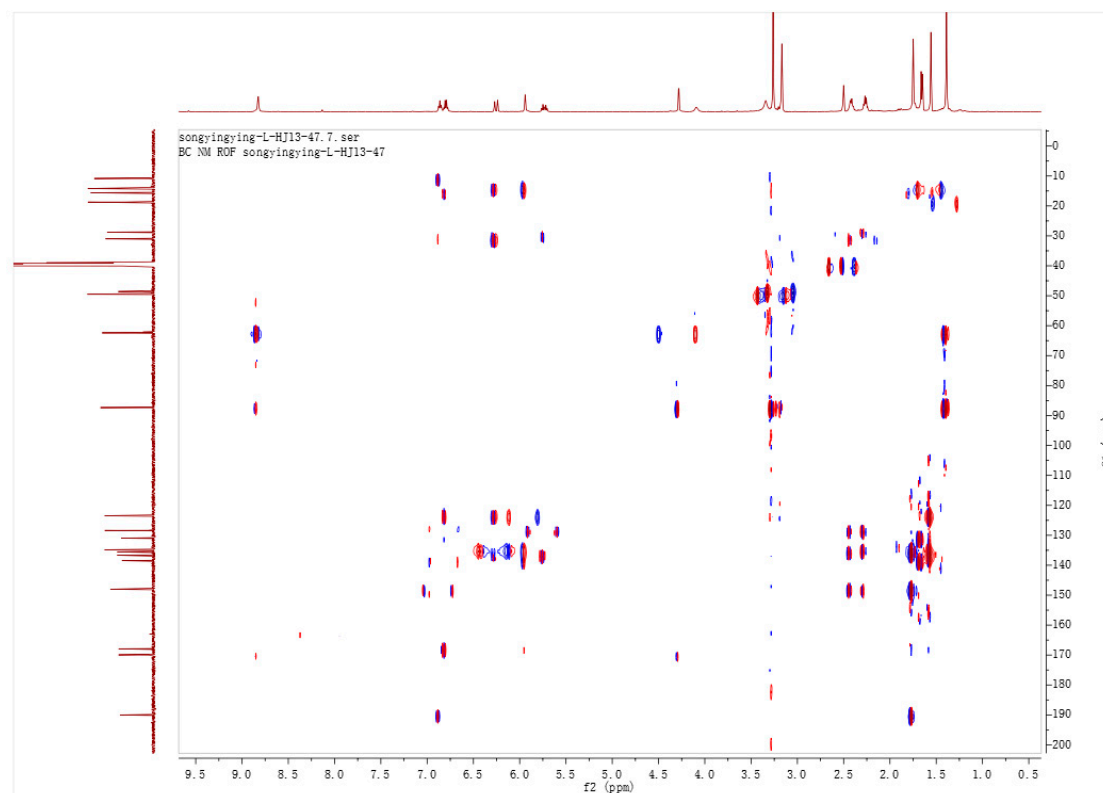

**Figure S6** HMBC spectrum of compound **1** in DMSO- $d_6$

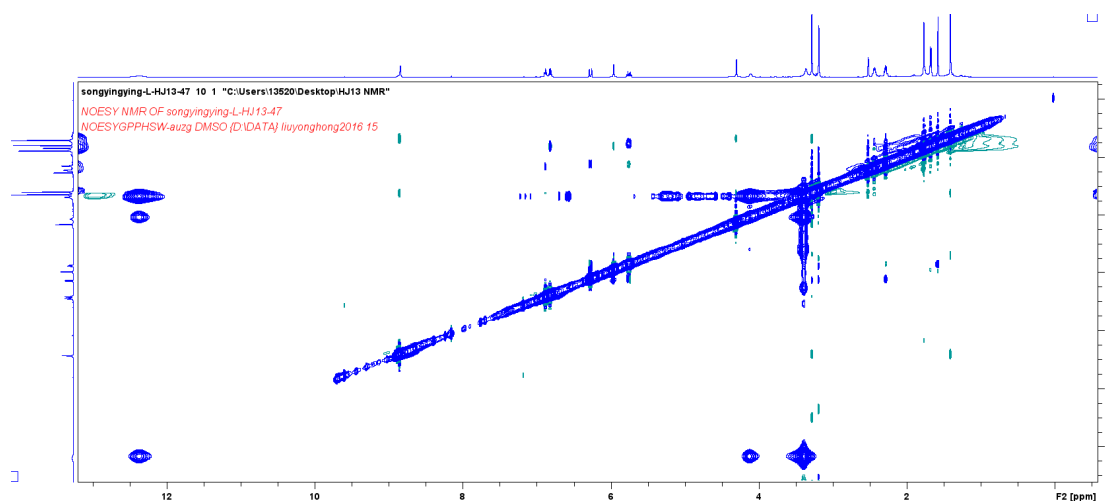

**Figure S7** NOESY spectrum of compound **1** in DMSO- $d_6$

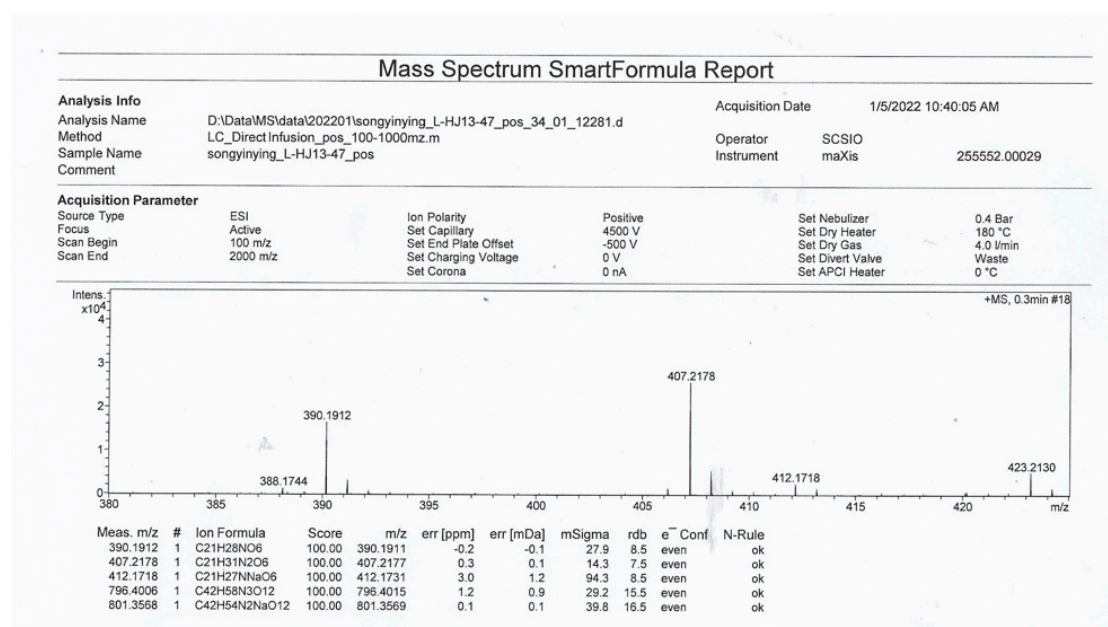

**Figure S8** HRESIMS spectrum of compound **1**



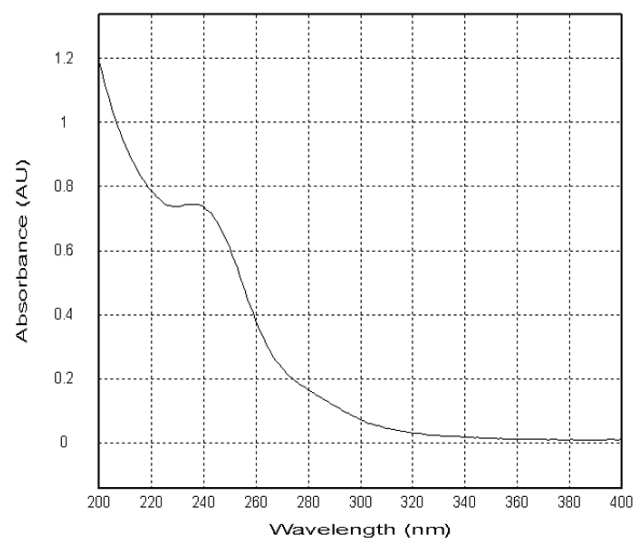

**Figure S9** UV spectrum of **1**

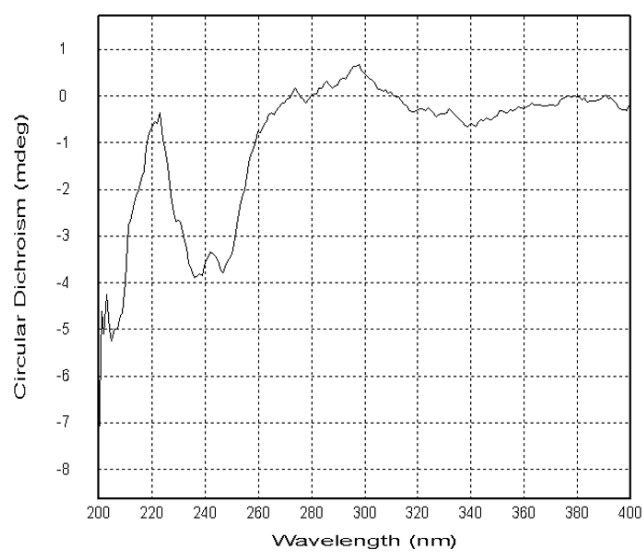

**Figure S10** CD spectrum of **1**

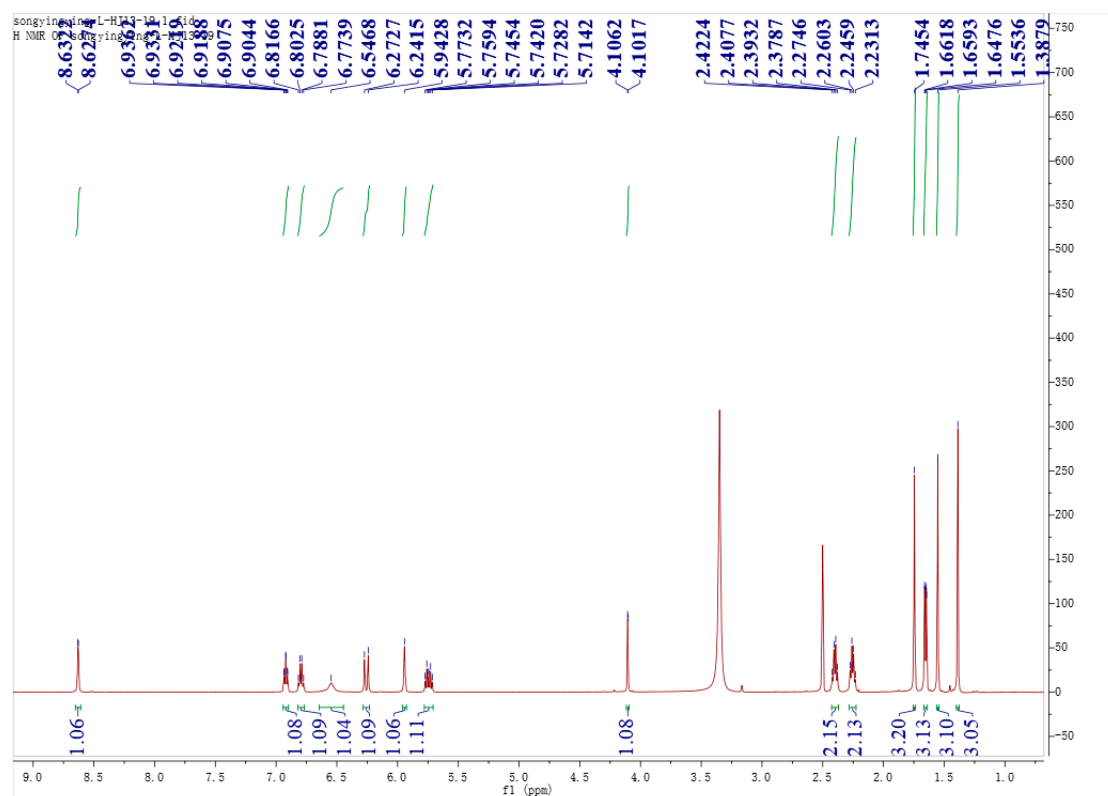

**Figure S11**  $^1\text{H}$  NMR spectrum of compound **2** in  $\text{DMSO-}d_6$

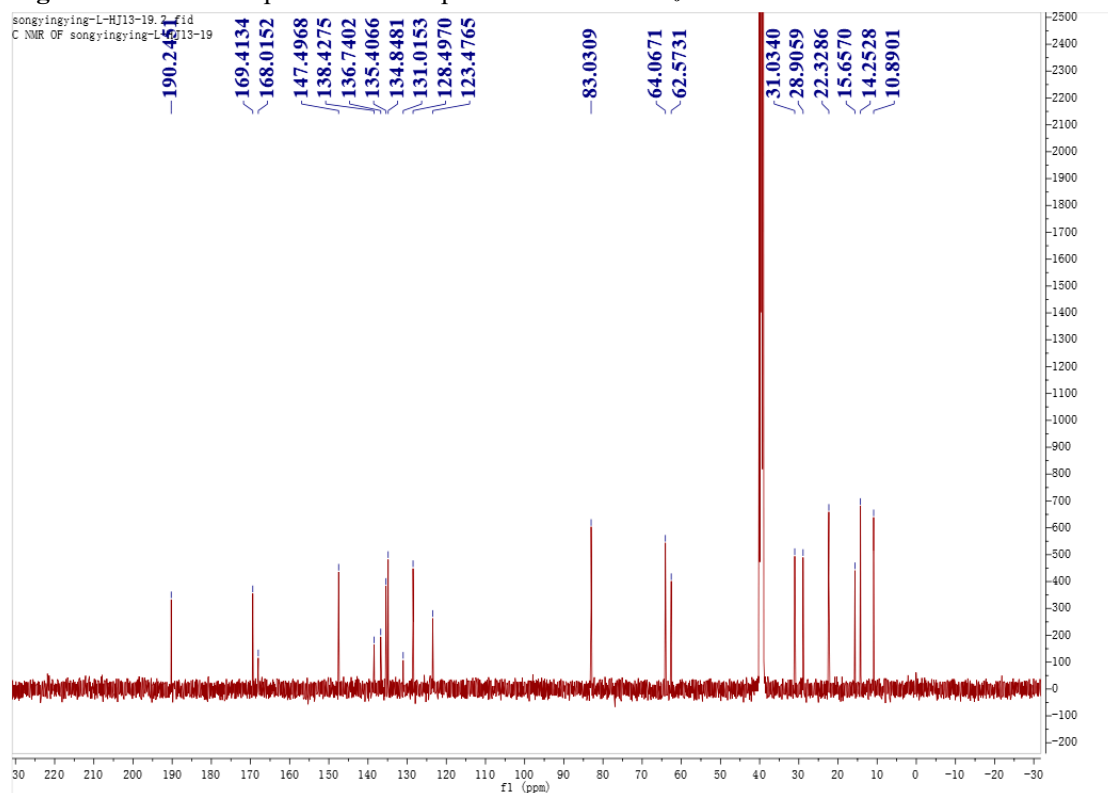

**Figure S12**  $^{13}\text{C}$  NMR spectrum of compound **2** in  $\text{DMSO-}d_6$

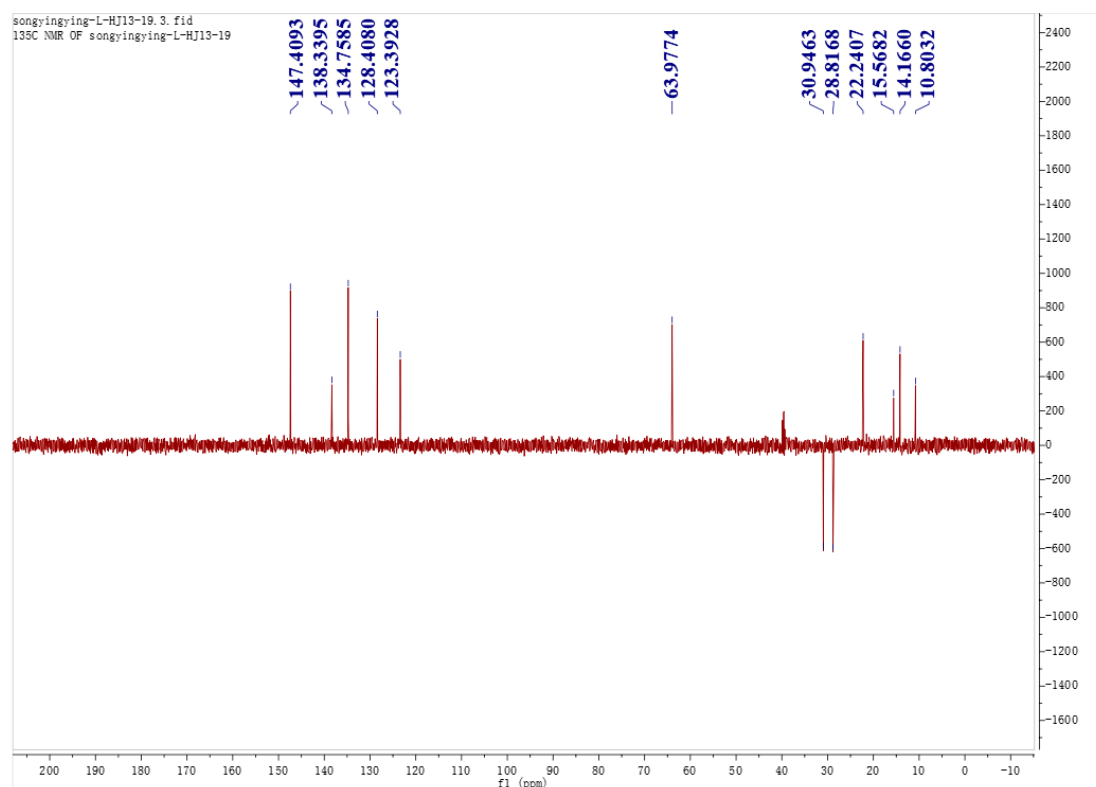

**Figure S13** DEPT135 spectrum of compound **2** in DMSO- $d_6$

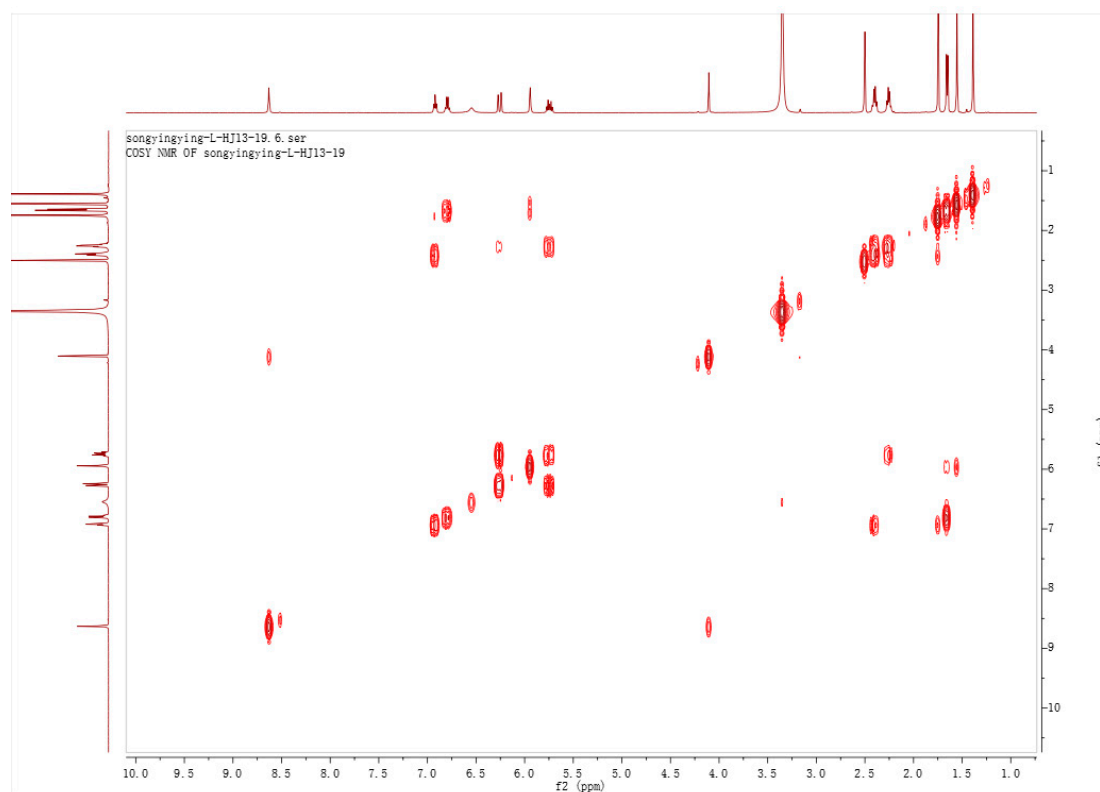

**Figure S14**  $^1\text{H}$ - $^1\text{H}$  COSY spectrum of compound **2** in DMSO- $d_6$

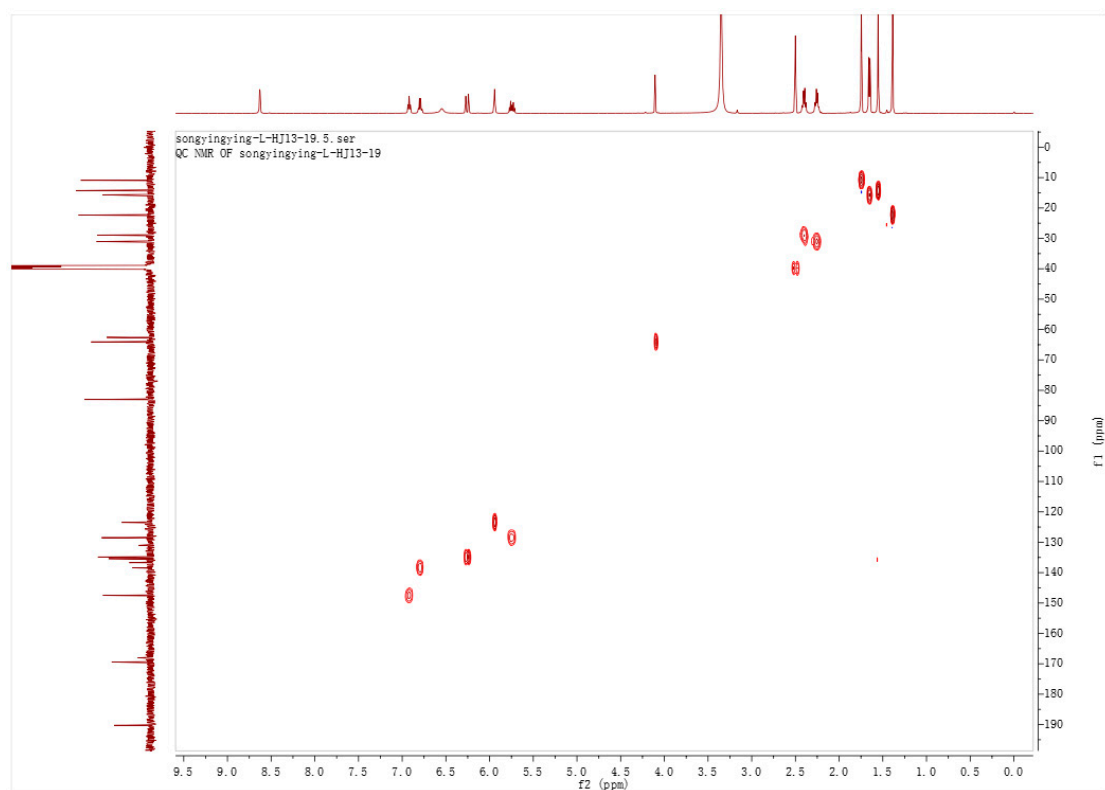

**Figure S15** HSQC spectrum of compound **2** in DMSO- $d_6$

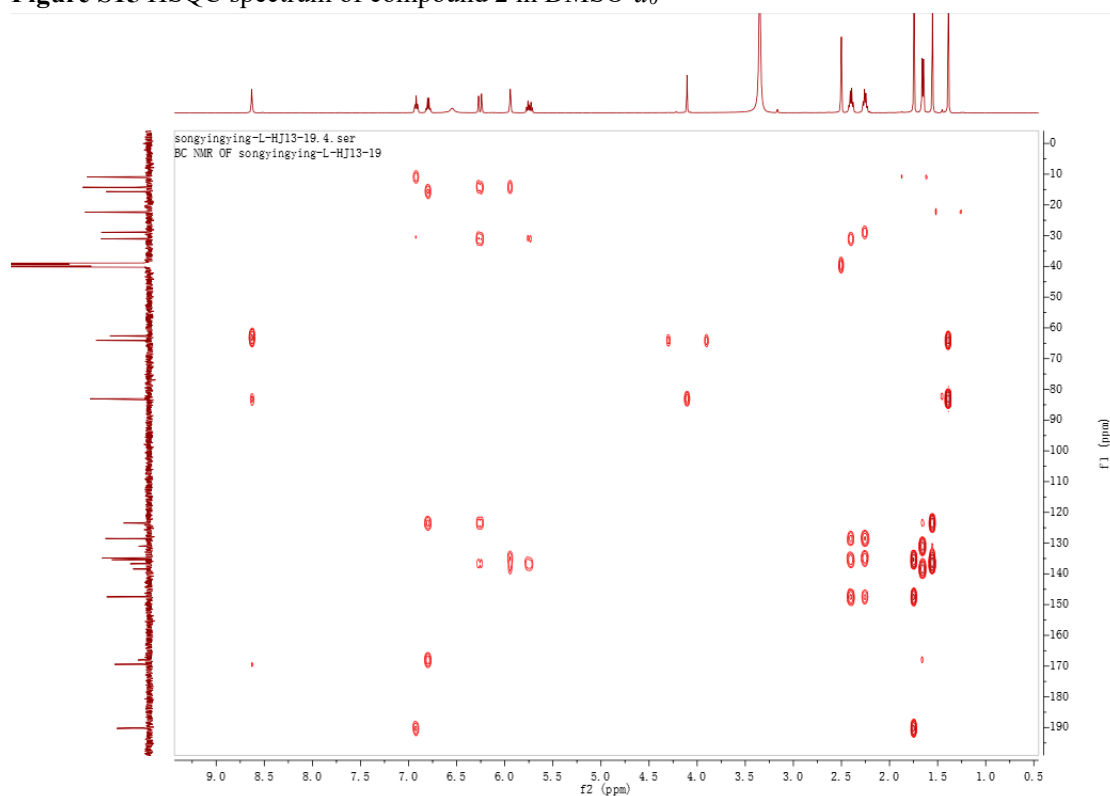

**Figure S16** HMBC spectrum of compound **2** in DMSO- $d_6$

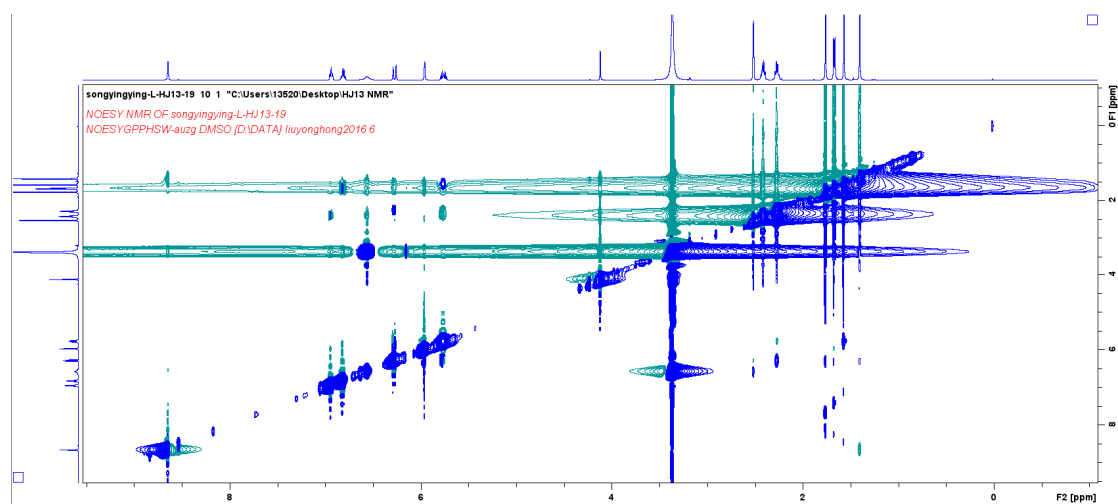

**Figure S17** NOESY spectrum of compound **2** in DMSO-*d*<sub>6</sub>

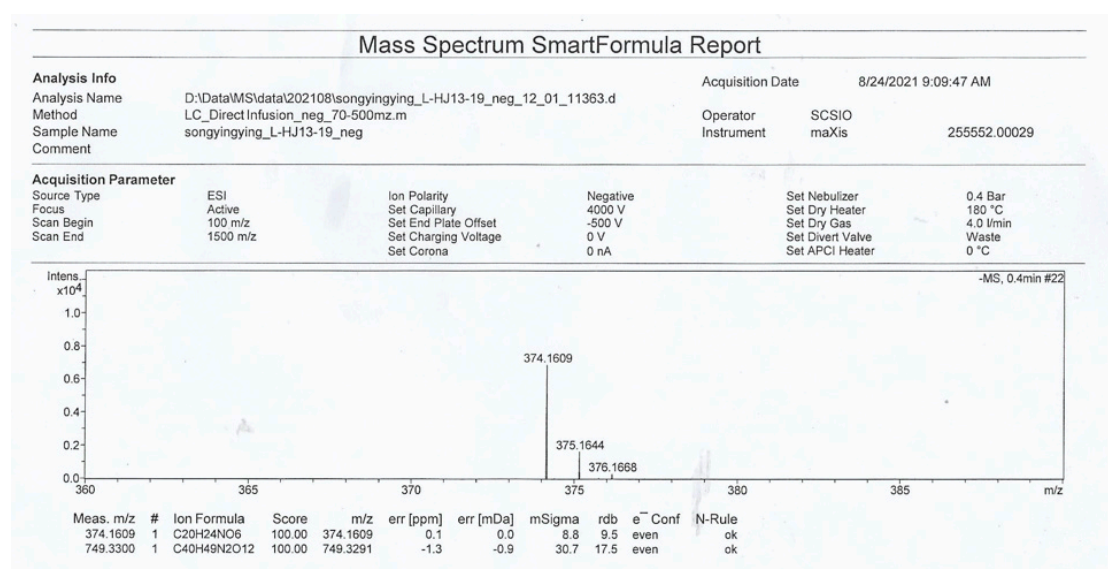

**Figure S18** HRESIMS spectrum of compound **2**

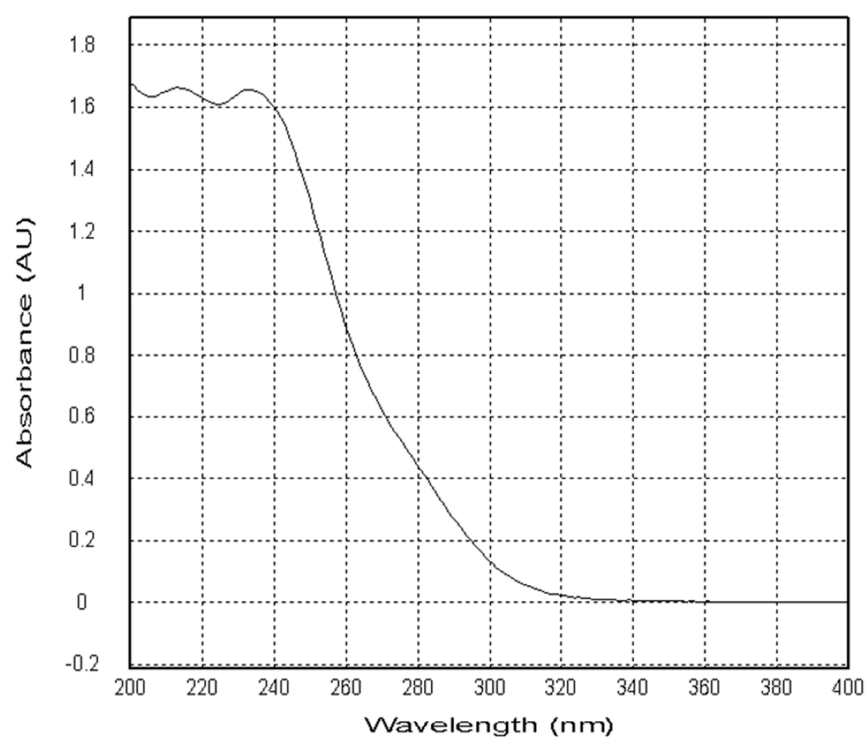

**Figure S19** UV spectrum of **2**

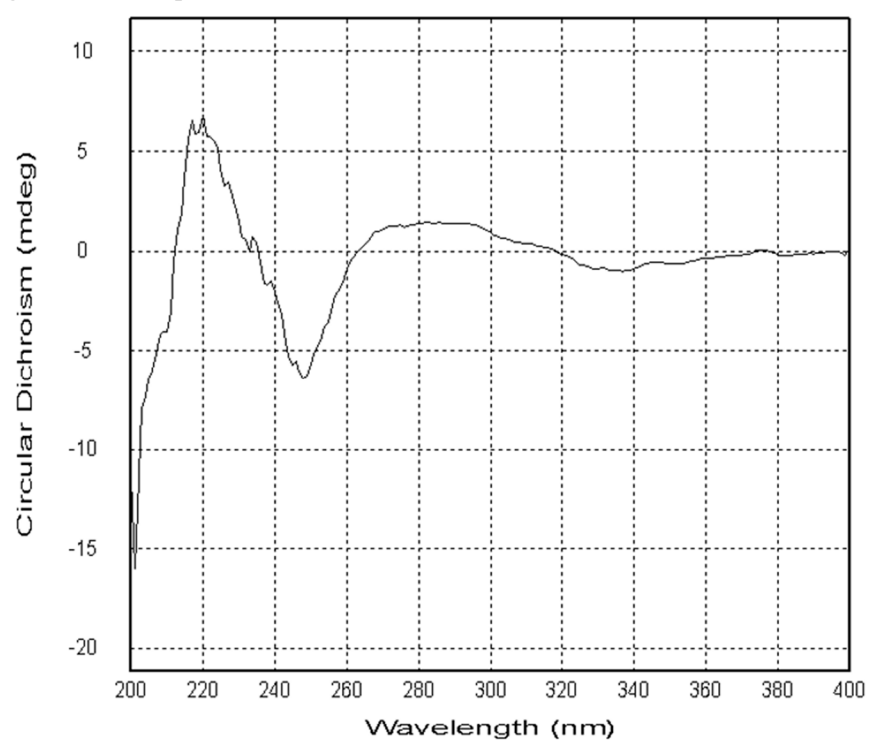

**Figure S20** CD spectrum of **2**

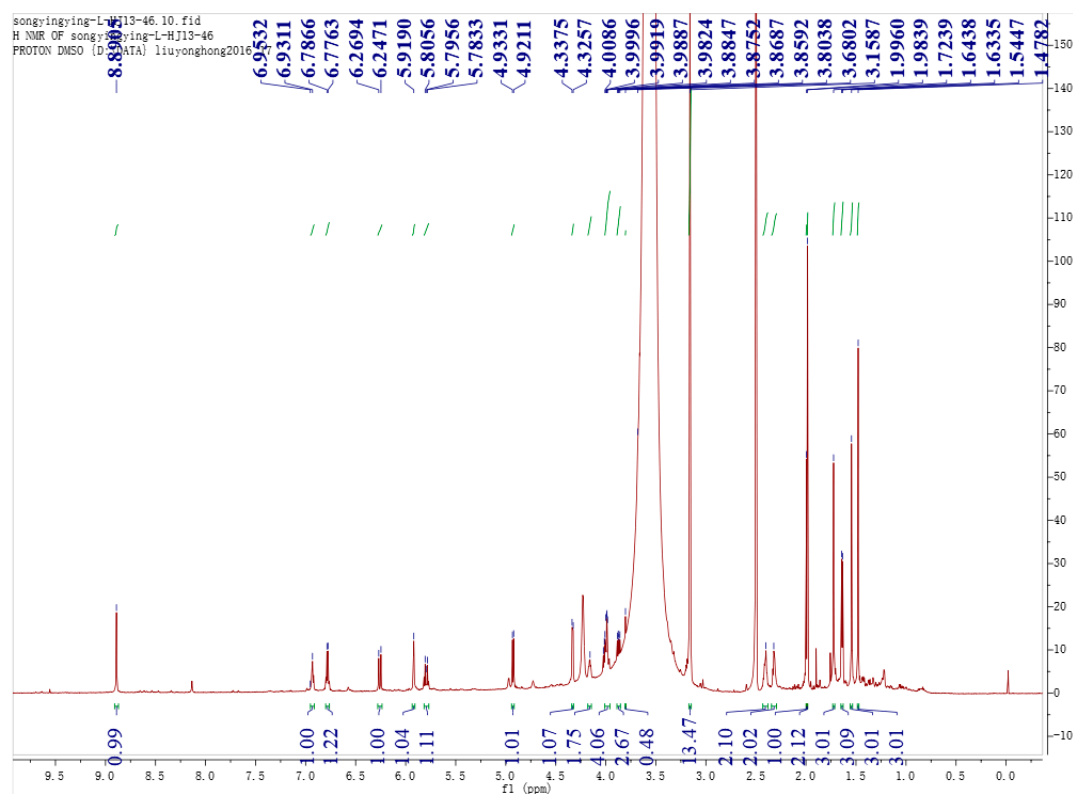

**Figure S21**  $^1\text{H}$  NMR spectrum of compound **3** in  $\text{DMSO-}d_6$

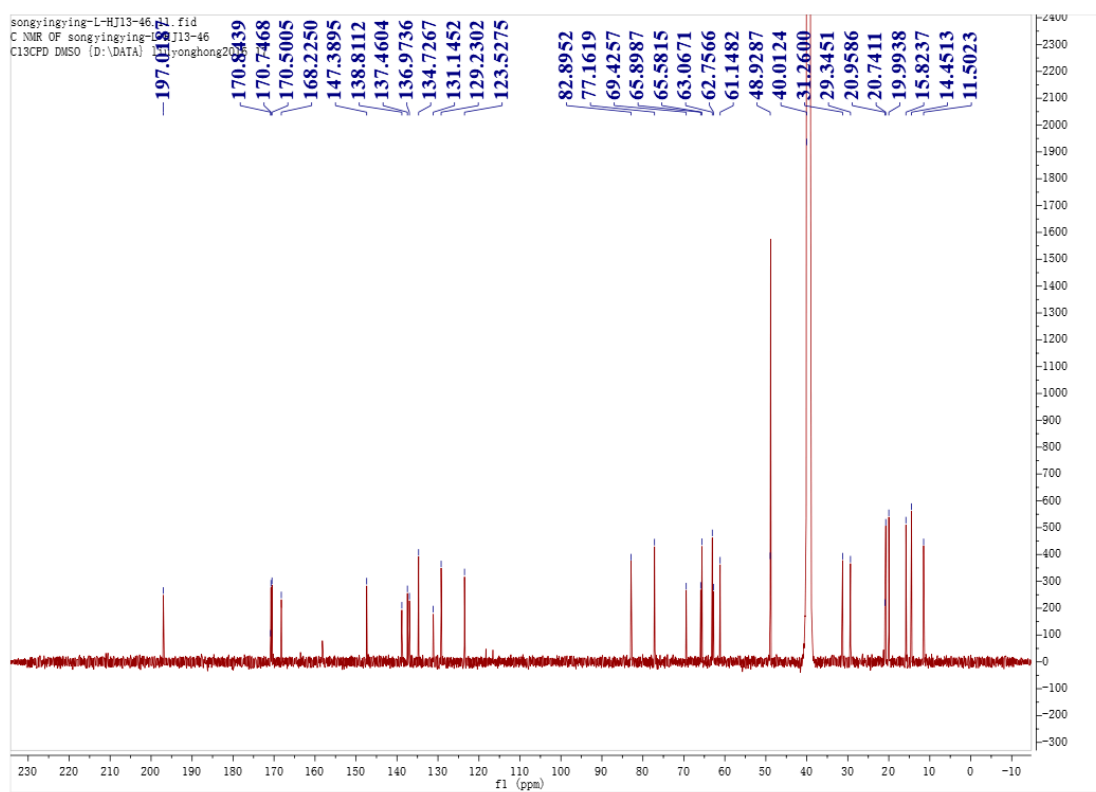

**Figure S22**  $^{13}\text{C}$  NMR spectrum of compound **3** in  $\text{DMSO-}d_6$

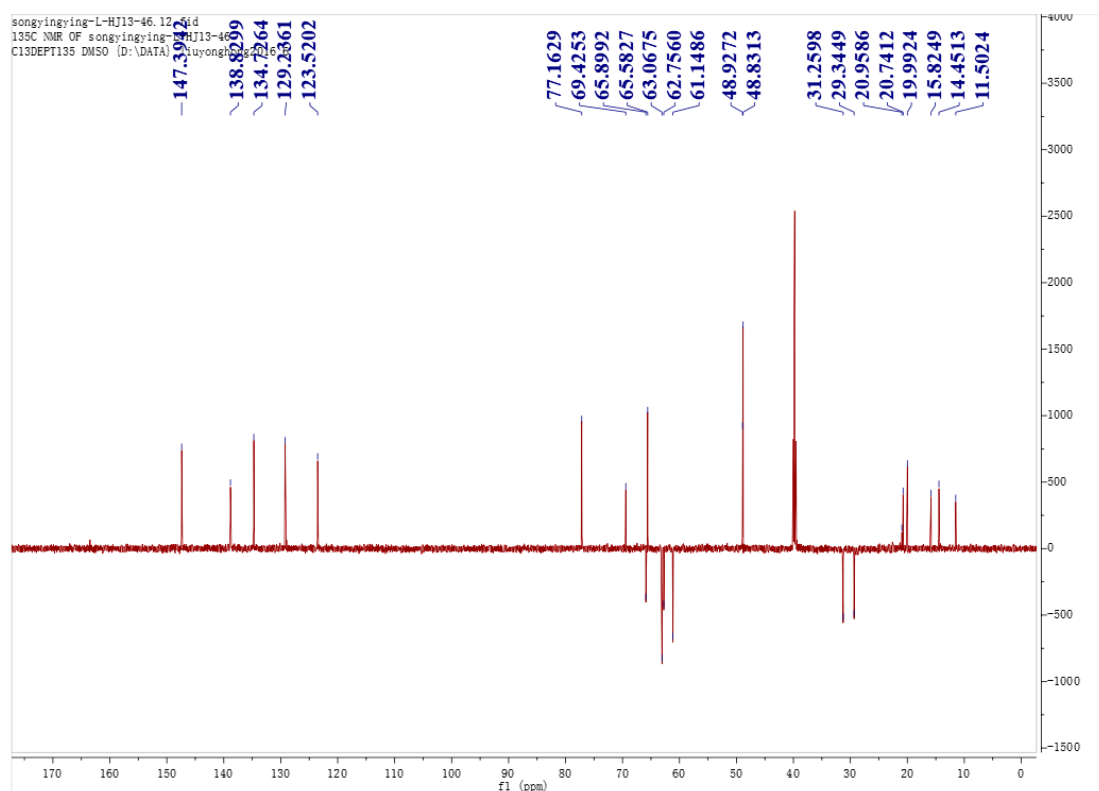

**Figure S23** DEPT135 spectrum of compound **3** in DMSO- $d_6$

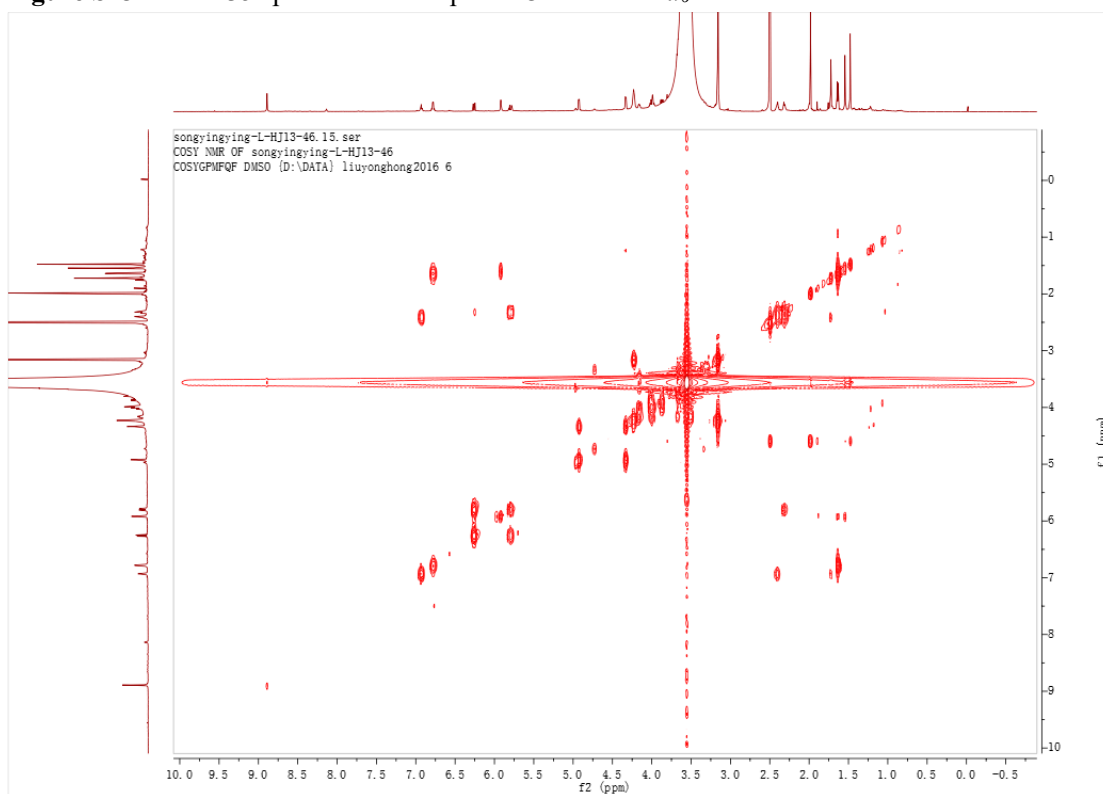

**Figure S24**  $^1\text{H}$ - $^1\text{H}$  COSY spectrum of compound **3** in DMSO- $d_6$



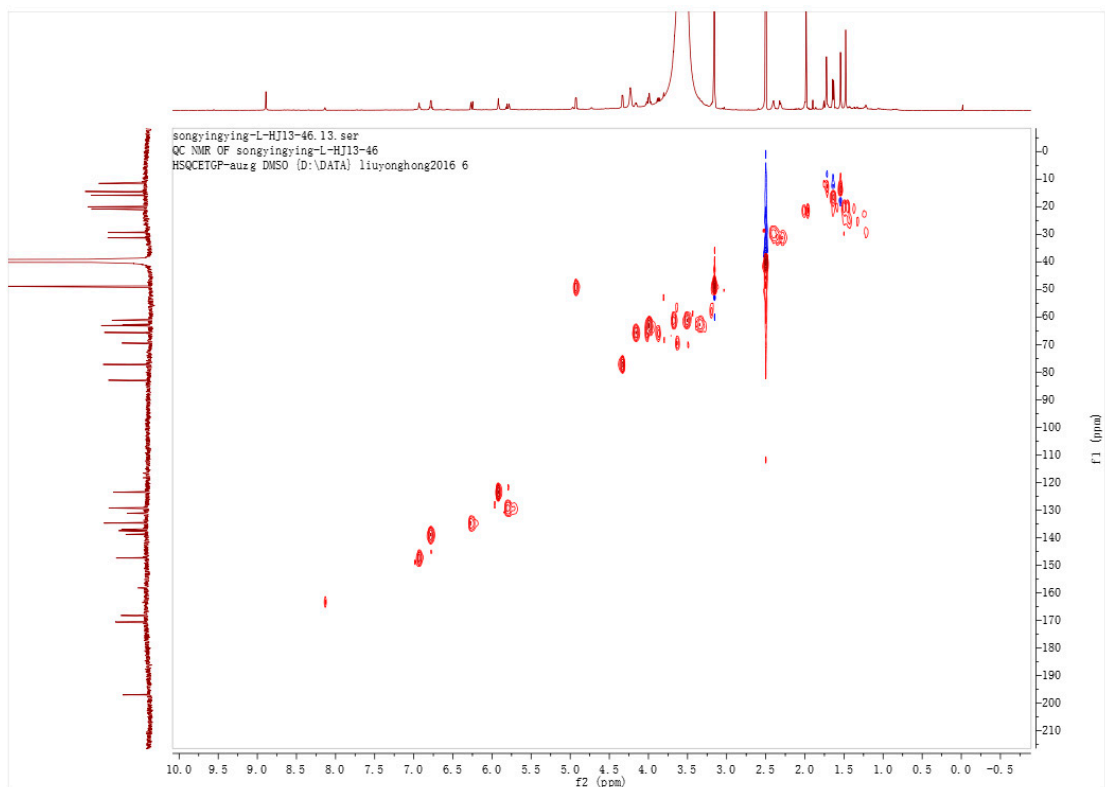

**Figure S25** HSQC spectrum of compound **3** in DMSO-*d*<sub>6</sub>

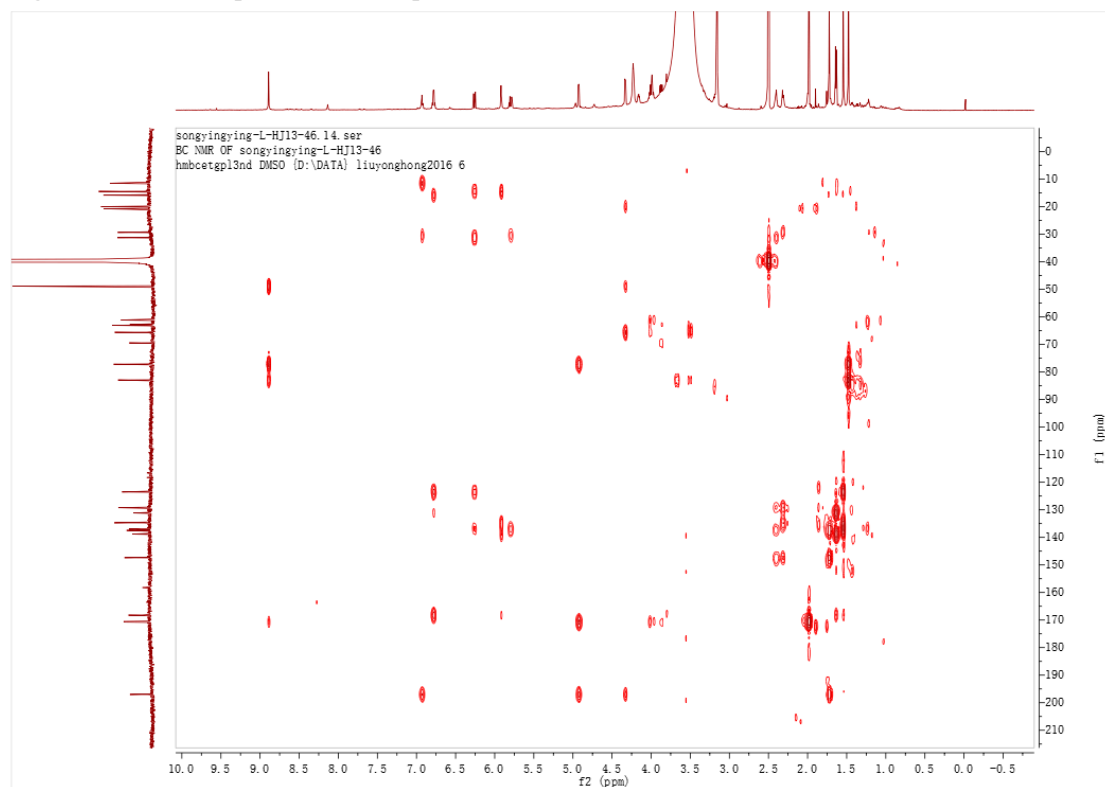

**Figure S26** HMBC spectrum of compound **3** in DMSO-*d*<sub>6</sub>

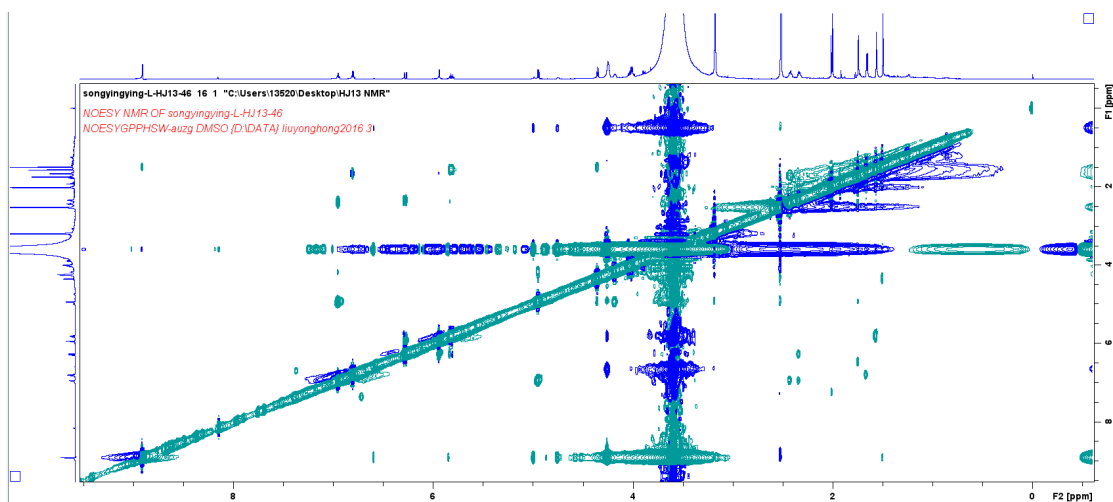

**Figure S27** NOESY spectrum of compound **3** in DMSO- $d_6$

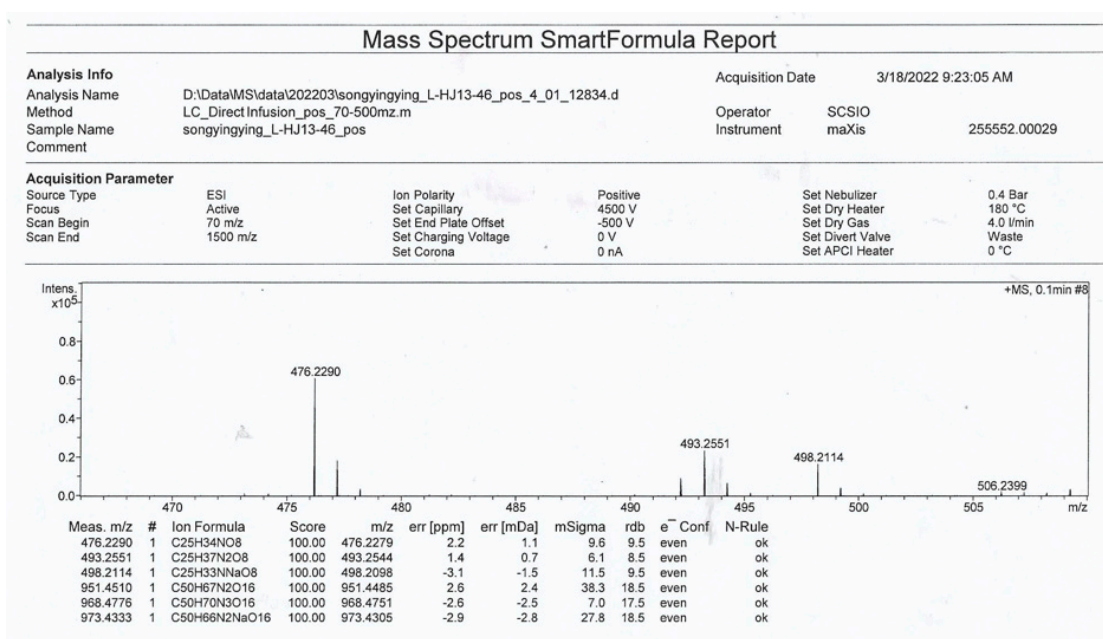

**Figure S28** HRESIMS spectrum of compound **3**

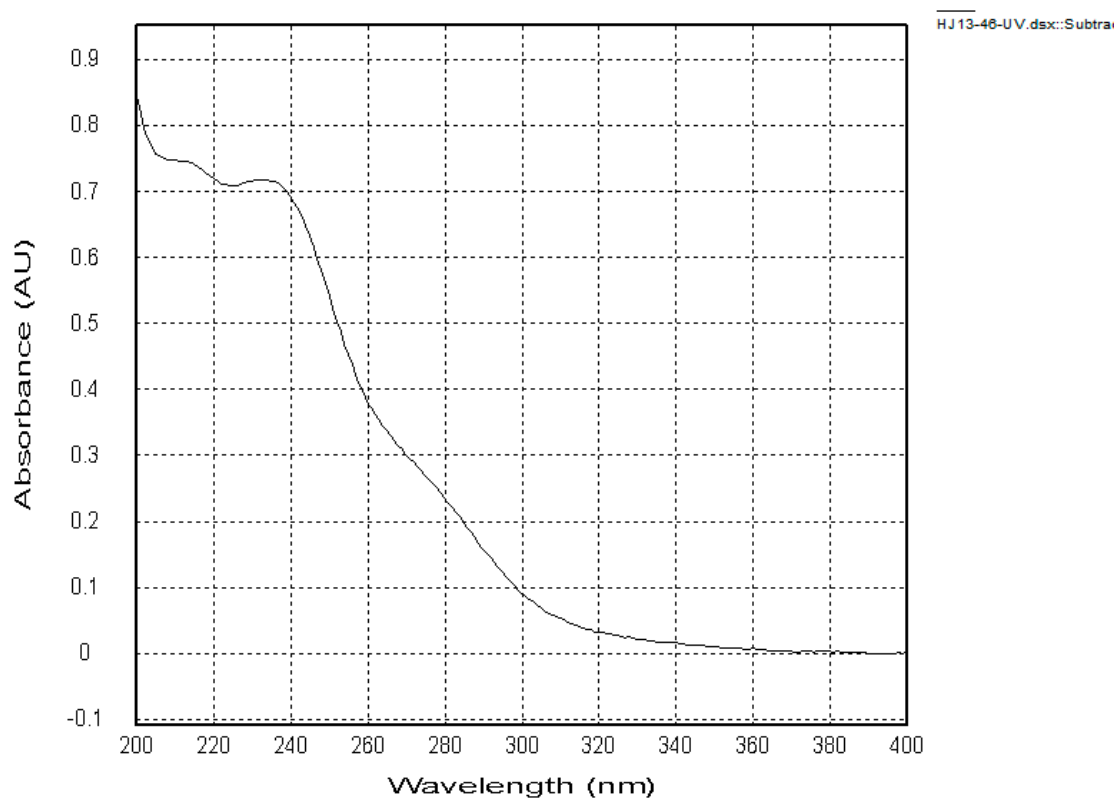

**Figure S29** UV spectrum of **3**

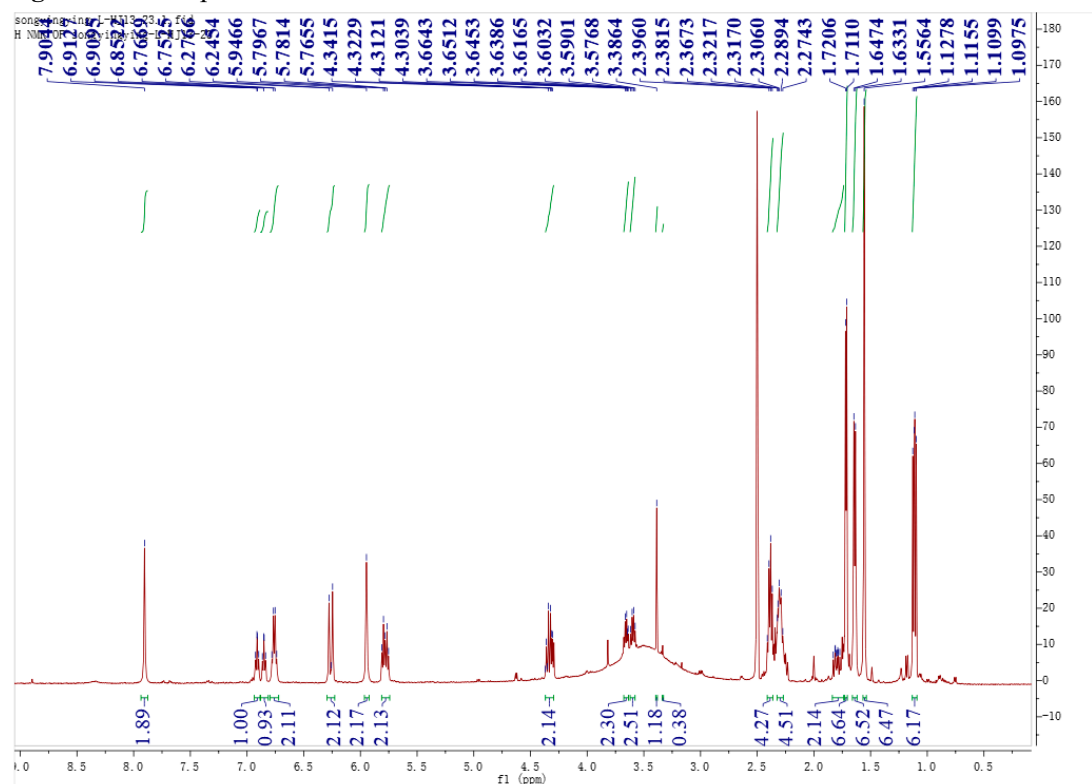

**Figure S30**  $^1\text{H}$  NMR spectrum of compound **4** in  $\text{DMSO}-d_6$

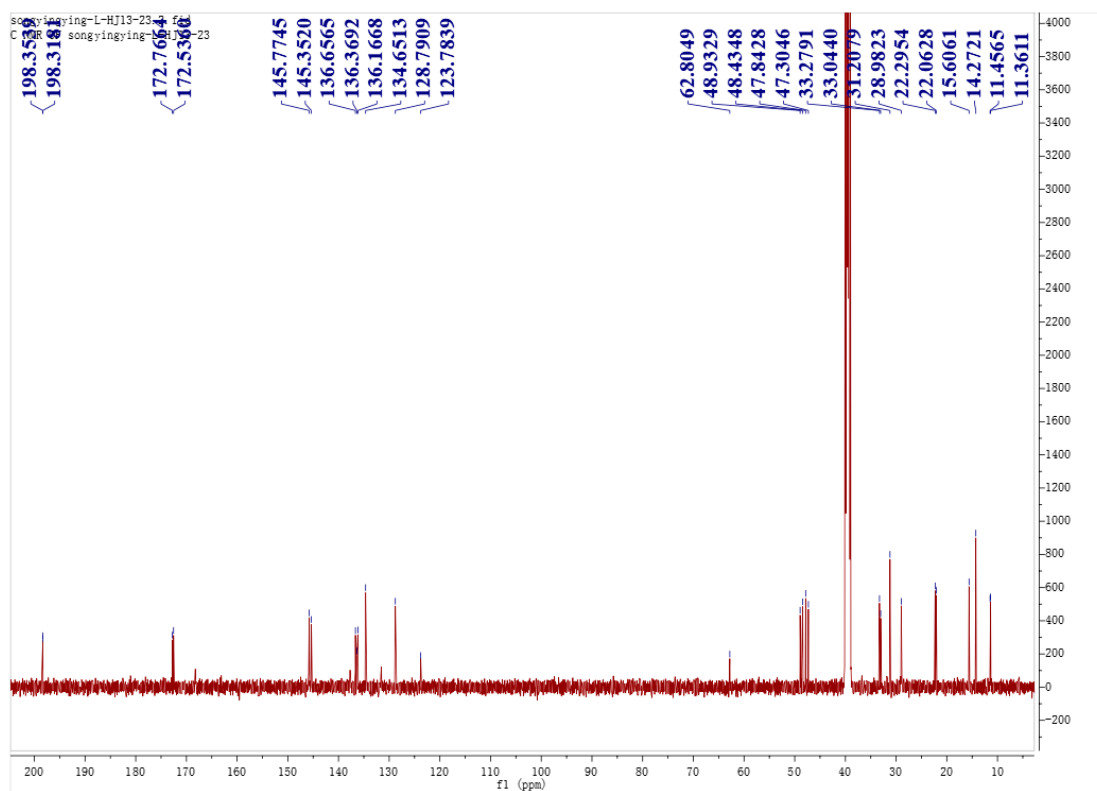

**Figure S31**  $^{13}\text{C}$  NMR spectrum of compound **4** in  $\text{DMSO}-d_6$

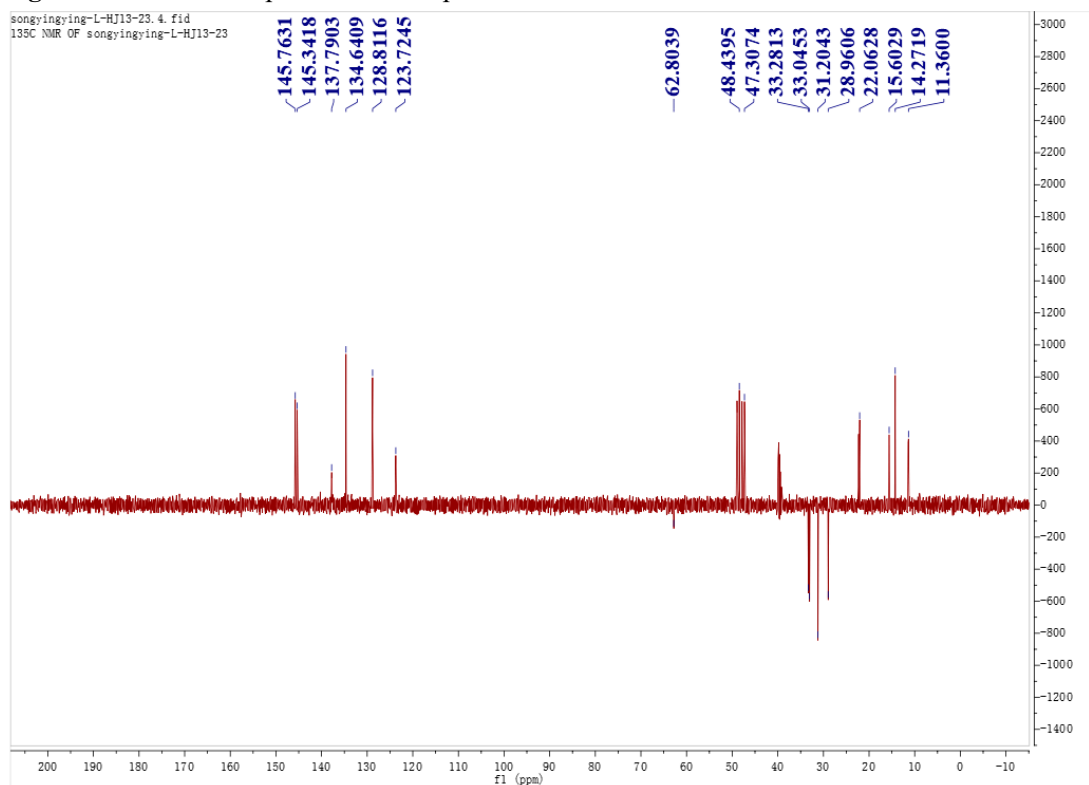

**Figure S32** DEPT135 spectrum of compound **4** in  $\text{DMSO}-d_6$

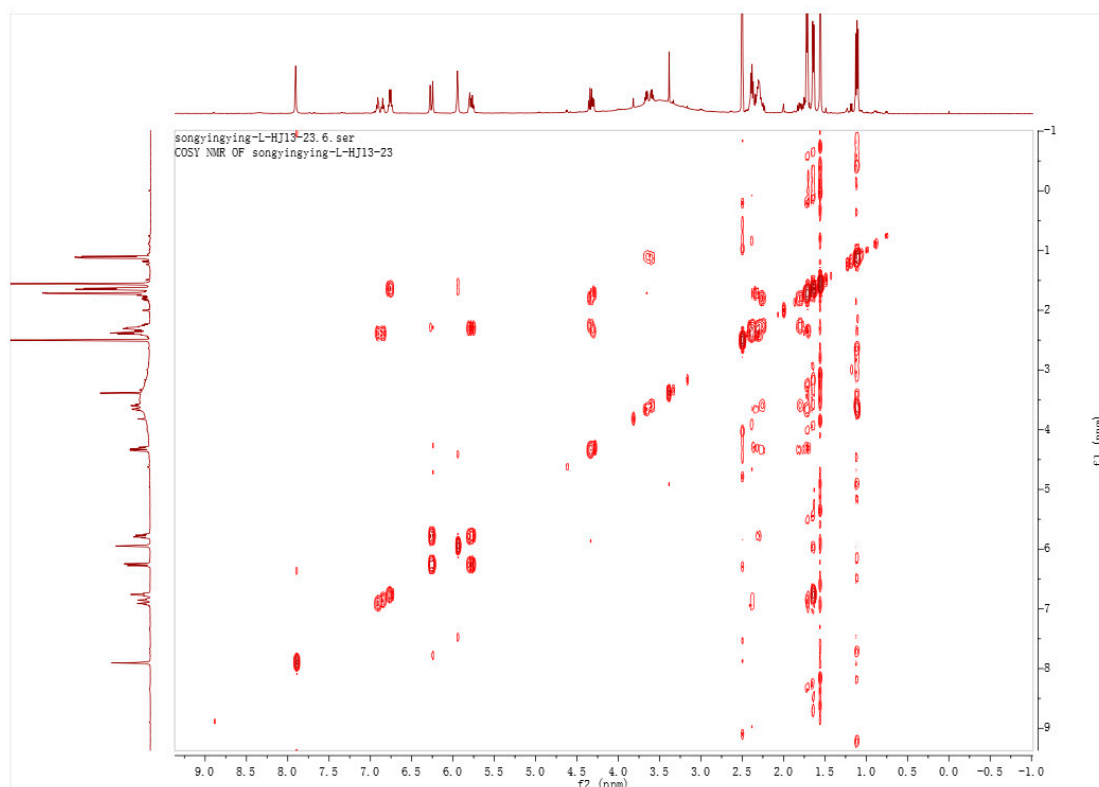

Figure S33  $^1\text{H}$ - $^1\text{H}$  COSY spectrum of compound **4** in  $\text{DMSO-}d_6$

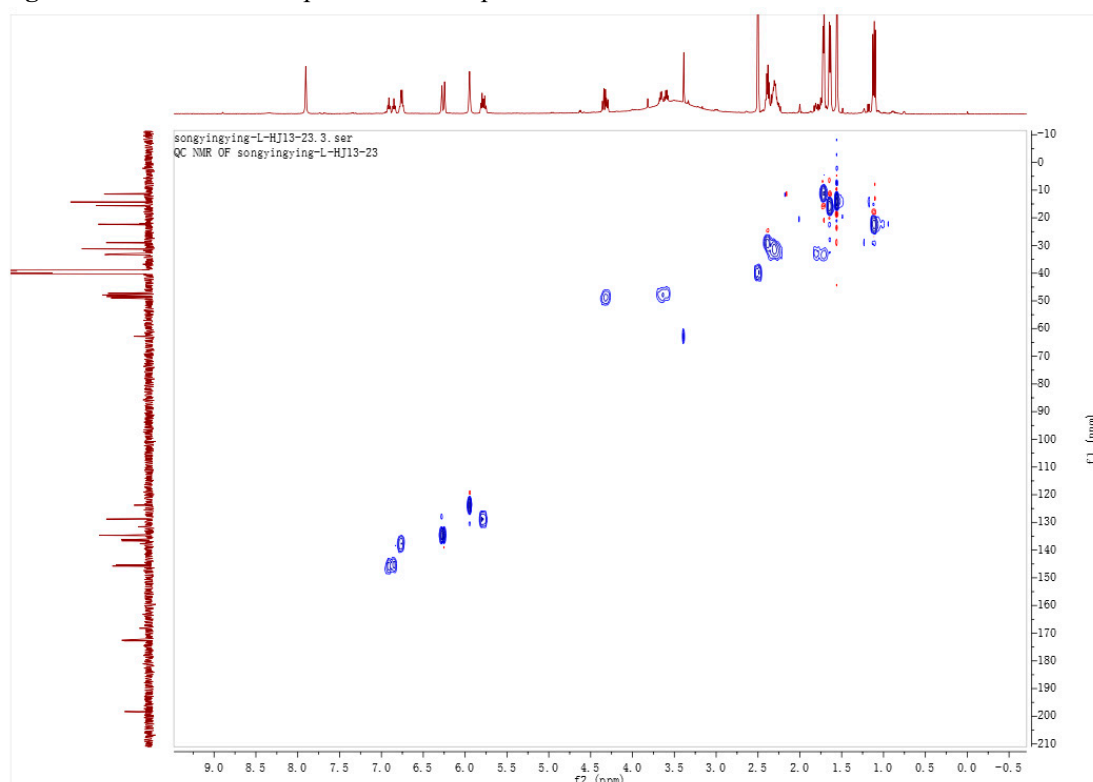

Figure S34 HSQC spectrum of compound **4** in  $\text{DMSO-}d_6$

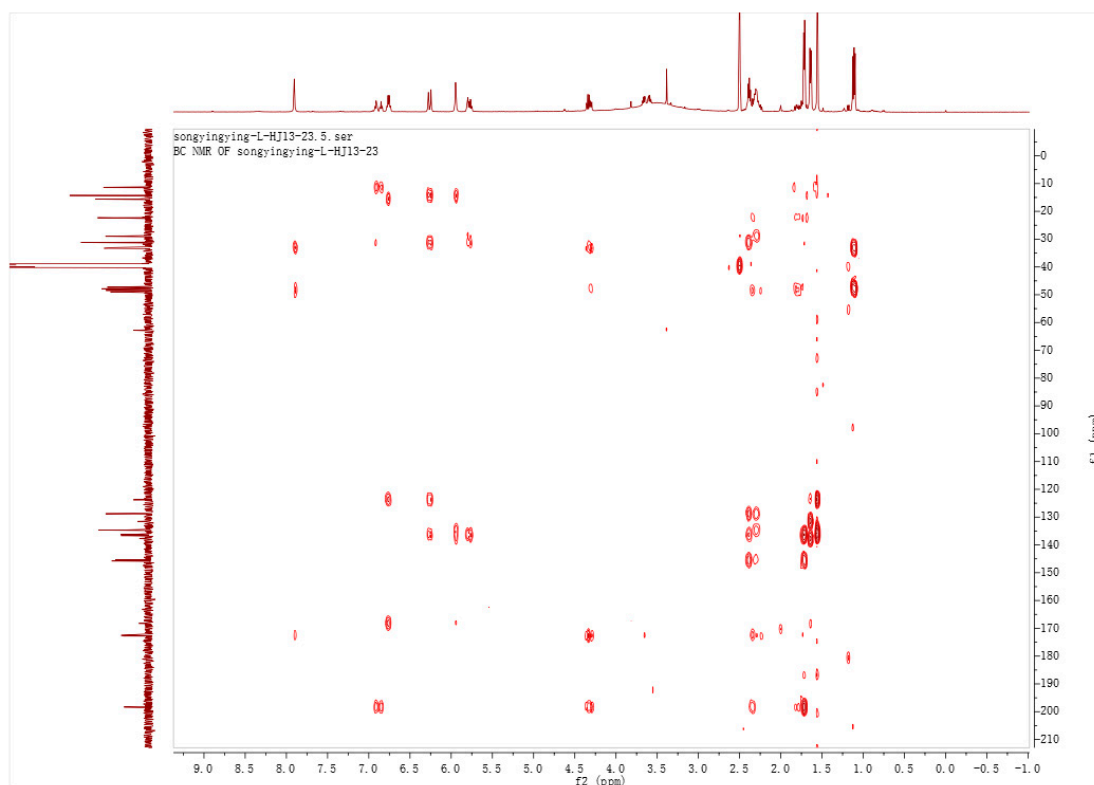

**Figure S35** HMBC spectrum of compound **4** in DMSO- $d_6$

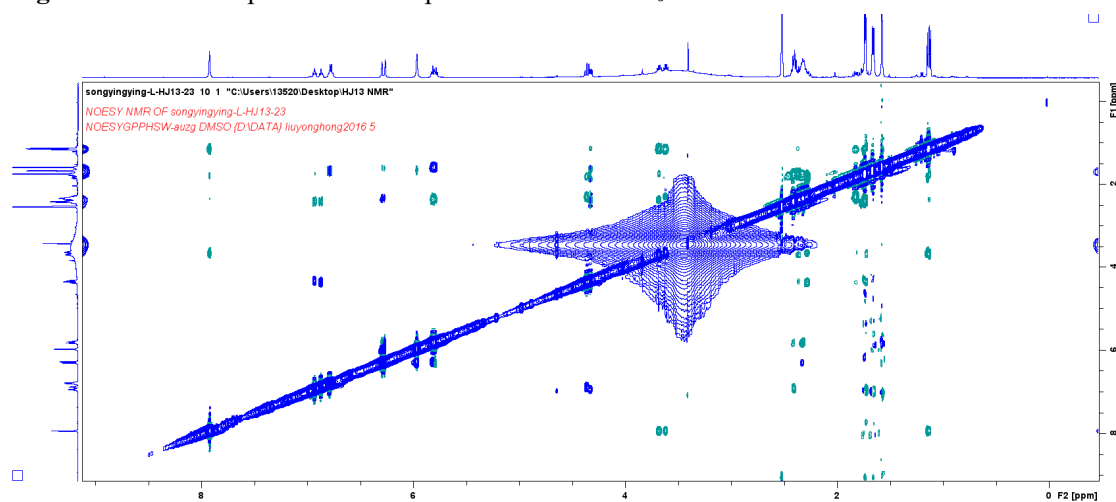

**Figure S36** NOESY spectrum of compound **4** in DMSO- $d_6$

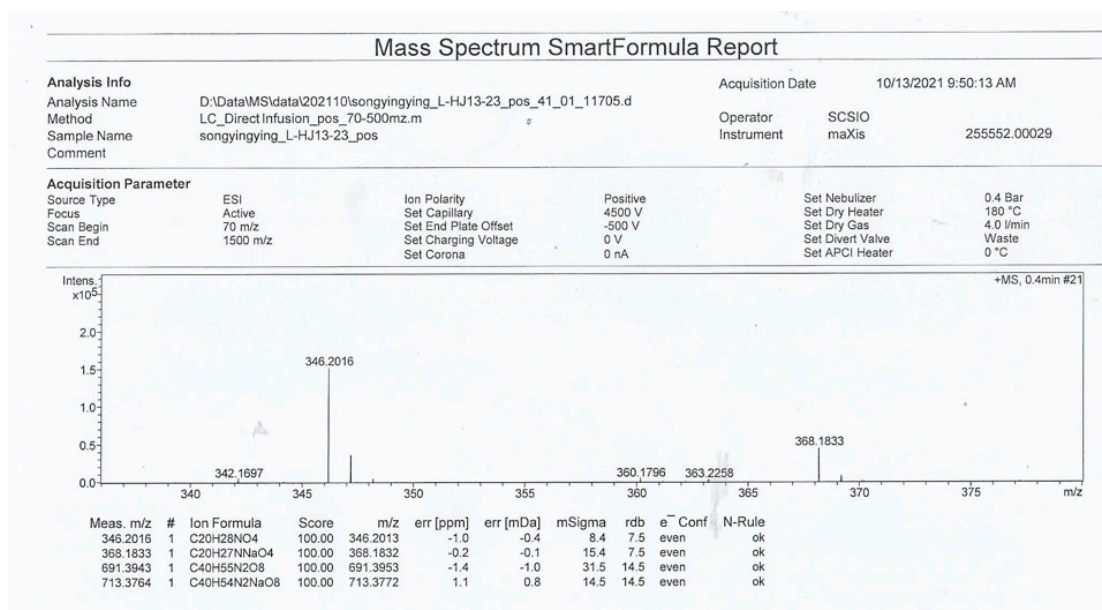

**Figure S37** HRESIMS spectrum of compound **4**

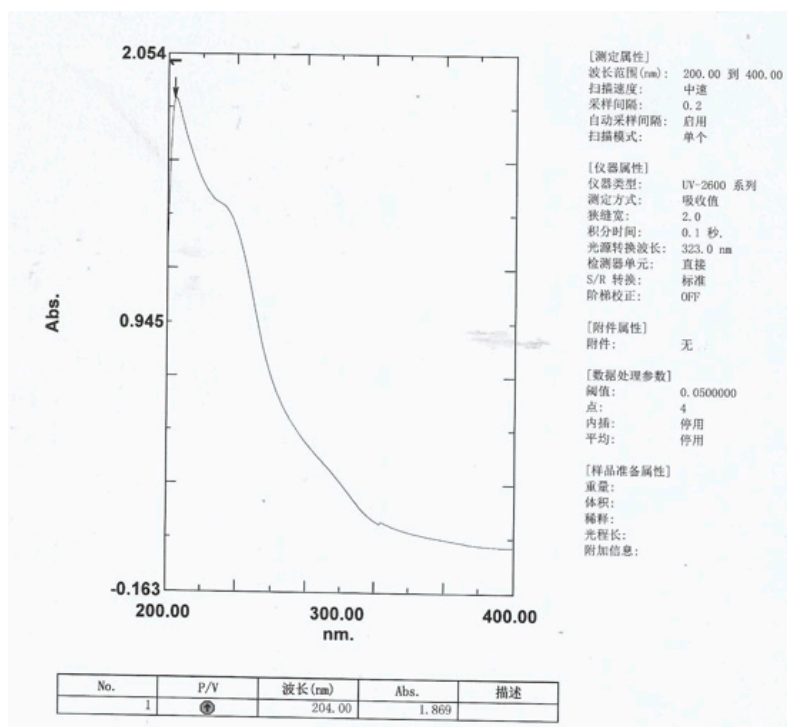

**Figure S38** UV spectrum of **4**

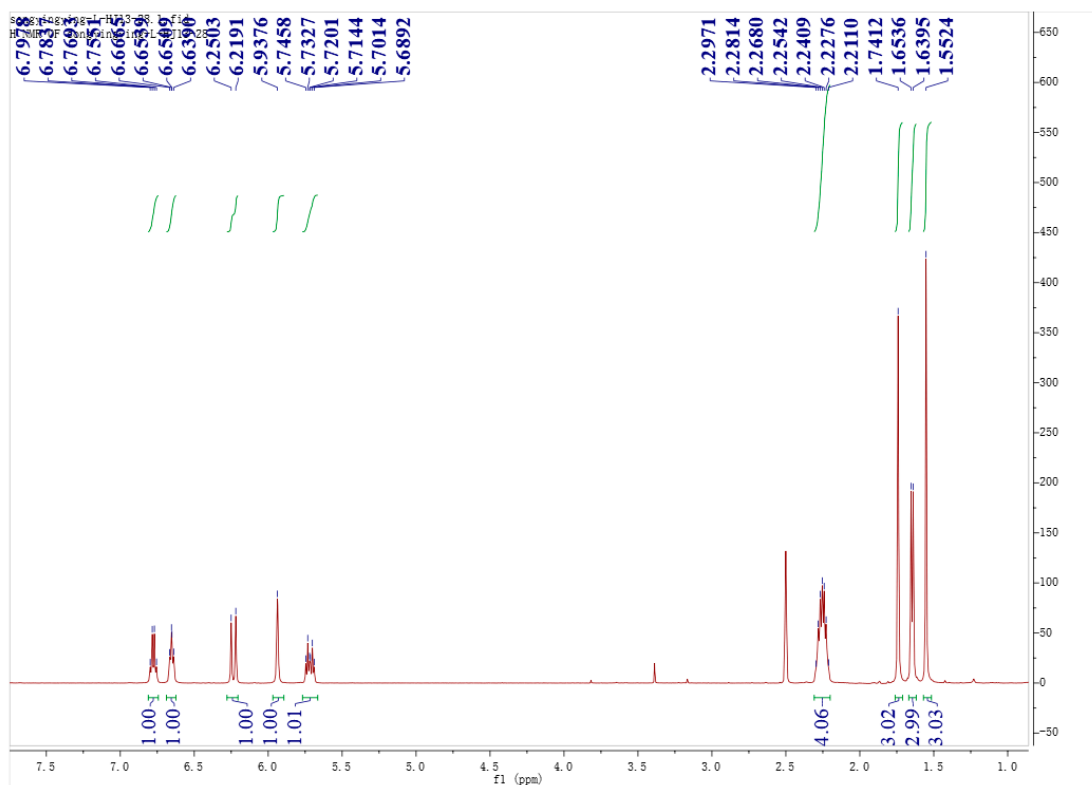

**Figure S39** <sup>1</sup>H NMR spectrum of compound **5** in DMSO-*d*<sub>6</sub>

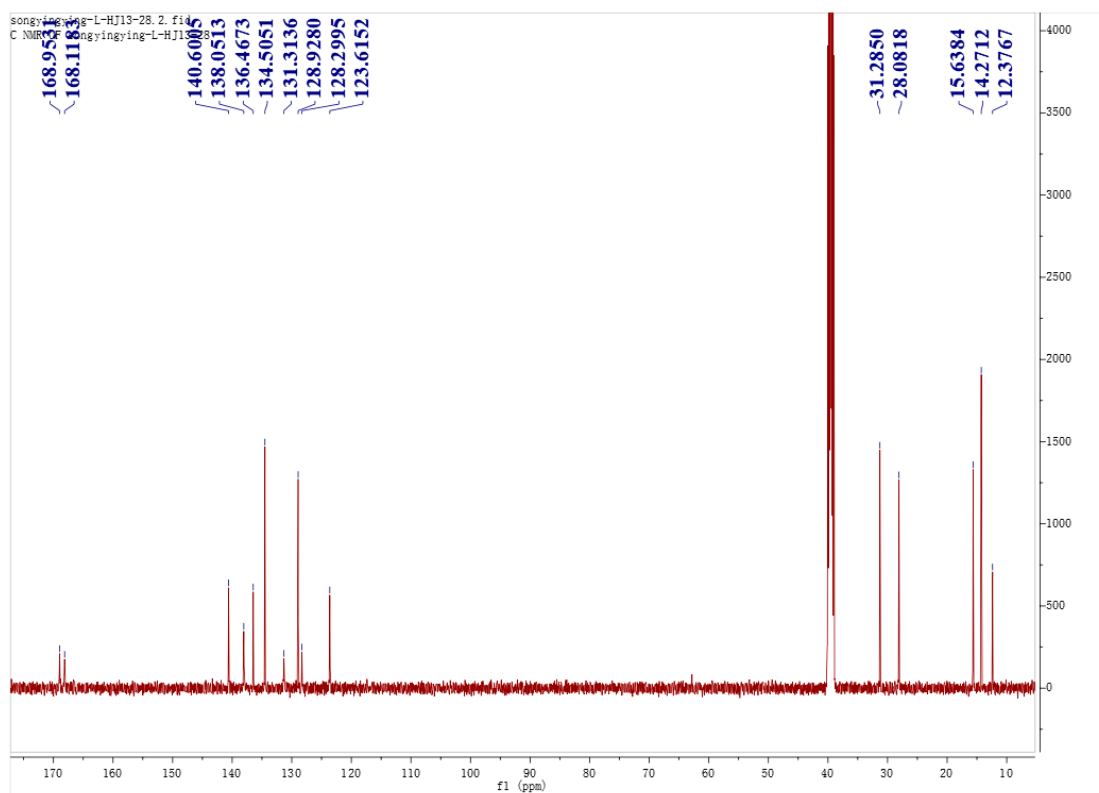

**Figure S40** <sup>13</sup>C NMR spectrum of compound **5** in DMSO-*d*<sub>6</sub>



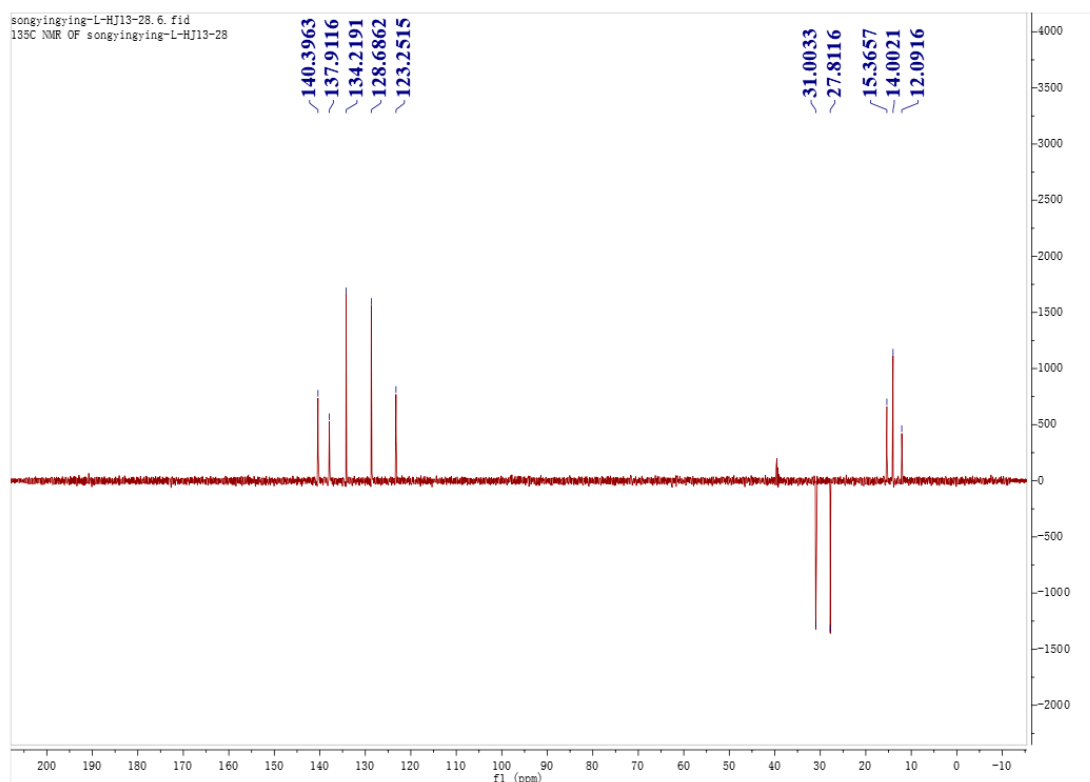

**Figure S41** DEPT135 spectrum of compound **5** in DMSO- $d_6$

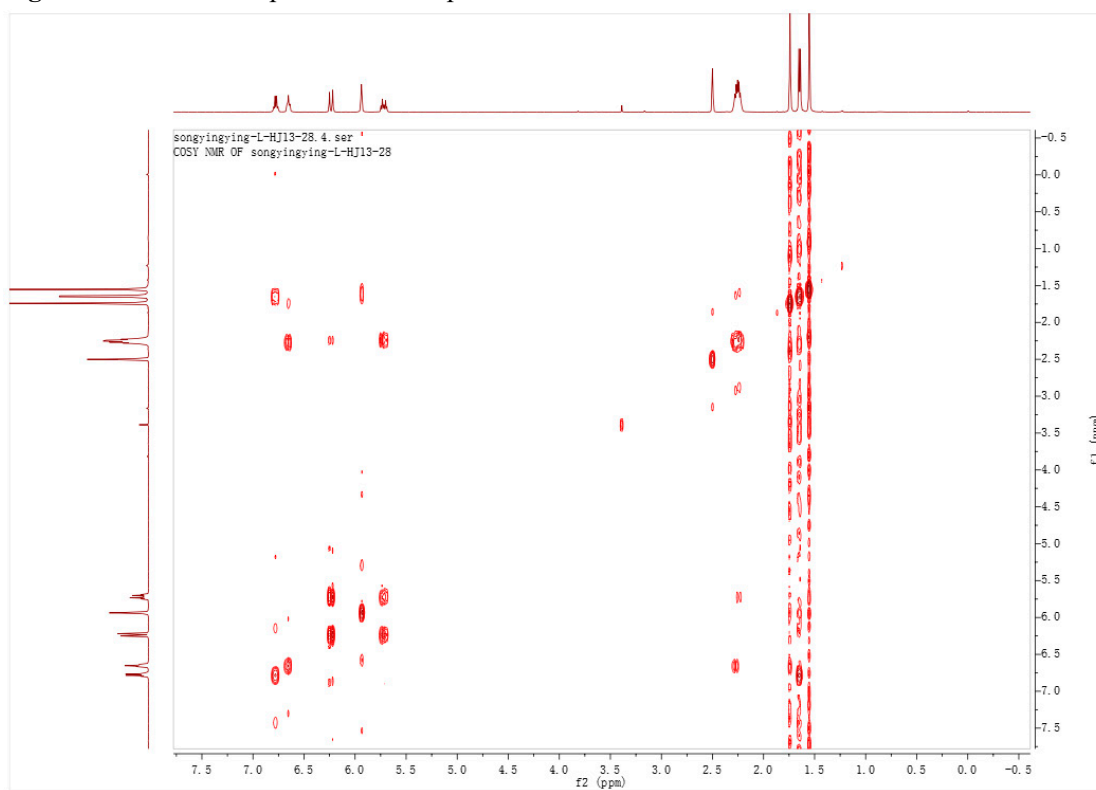

**Figure S42**  $^1\text{H}$ - $^1\text{H}$  COSY spectrum of compound **5** in DMSO- $d_6$

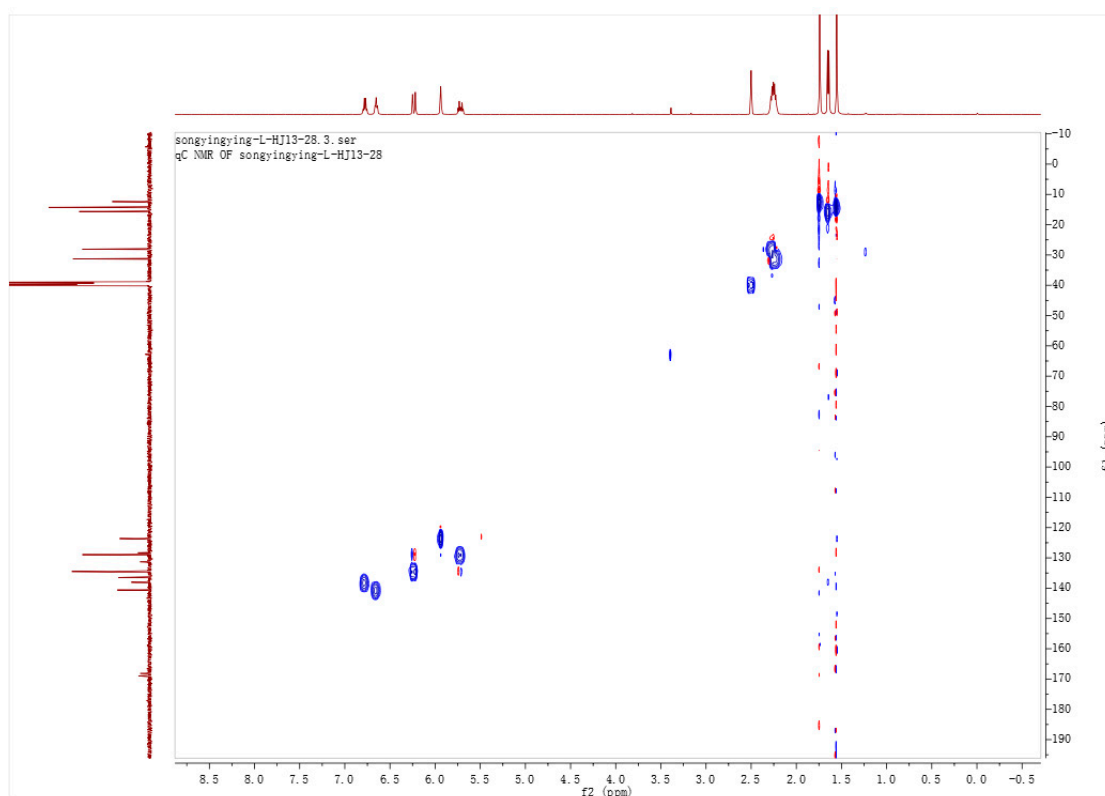

**Figure S43** HSQC spectrum of compound **5** in DMSO- $d_6$

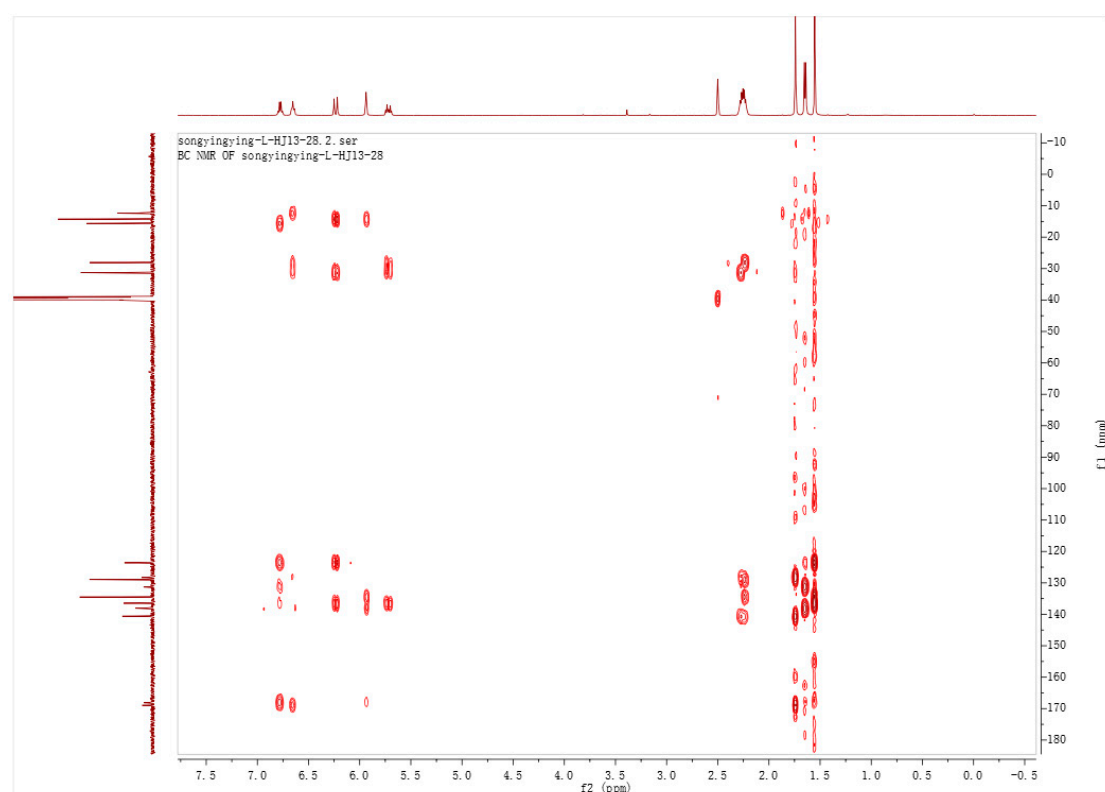

**Figure S44** HMBC spectrum of compound **5** in DMSO- $d_6$

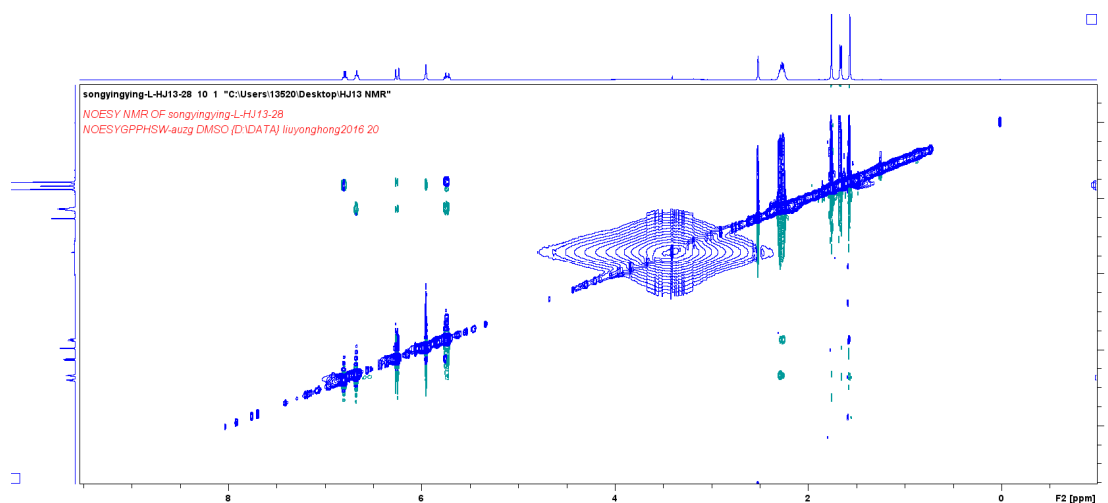

**Figure S45** NOESY spectrum of compound **5** in DMSO- $d_6$

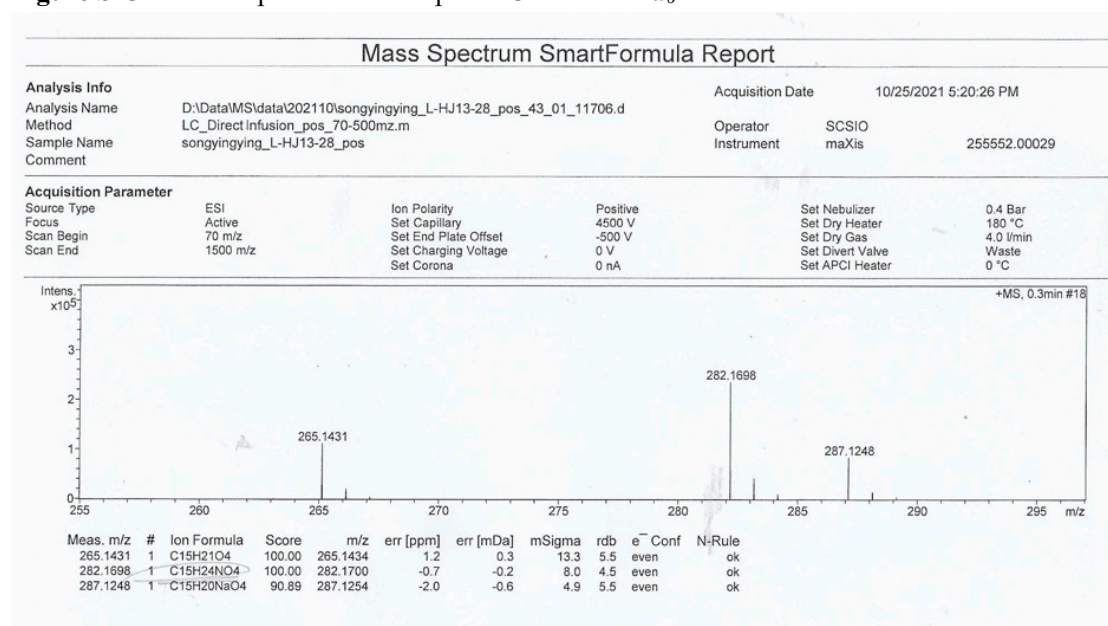

**Figure S46** HRESIMS spectrum of compound **5**

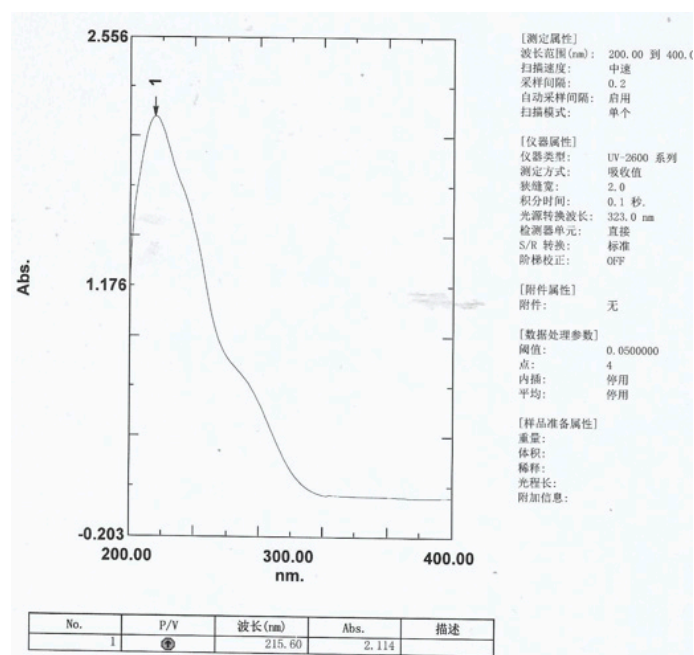

**Figure S47** UV spectrum of **5**

**Table S1** Energies of **1** and **2** at MMFF94 force field

| Conformer                                  | Energy (kcal/mol) | $\Delta E$ (kcal/mol) | Population (%) |
|--------------------------------------------|-------------------|-----------------------|----------------|
| 13 <i>R</i> , 14 <i>R</i> , 15 <i>R</i> -1 | 22.42             | 0.00                  | 100.00         |
| 13 <i>S</i> , 14 <i>R</i> , 15 <i>R</i> -1 | 30.13             | 0.00                  | 100.00         |
| 13 <i>R</i> , 14 <i>R</i> , 15 <i>R</i> -2 | 32.42             | 0.00                  | 100.00         |

**Table S2** Energies of **1** and **2** at B97-3c level in methanol

| Conformer                                  | Configuration                                                                       | E (Hartree) | Energy (kcal/mol) | $\Delta E$ (kcal/mol) | Population (%) |
|--------------------------------------------|-------------------------------------------------------------------------------------|-------------|-------------------|-----------------------|----------------|
| 13 <i>R</i> , 14 <i>R</i> , 15 <i>R</i> -1 | 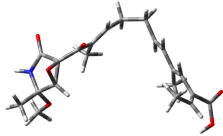 | -2529       | -1392032.79       | 0.00                  | 100.00         |
| 13 <i>S</i> , 14 <i>R</i> , 15 <i>R</i> -1 |  | -2390       | -1499748.9        | 0.00                  | 100.00         |
| 13 <i>R</i> , 14 <i>R</i> , 15 <i>R</i> -2 |  | -2379       | -1485709.29       | 0.00                  | 100.00         |
